# Supplementary material for: COVID-19 patients share common, corticosteroid-independent features of impaired host immunity to pathogenic molds
Source: PubMed Central journal article supplement (PMC9427195; doi:10.3389/fimmu.2022.954985), 2022-08-16

# COVID-19 patients share common, corticosteroid-independent features of impaired host immunity to pathogenic molds

## Supplementary Methods

Beeke Tappe<sup>1,#</sup> and Chris D. Lauruschkat<sup>1,#</sup>, Lea Strobel<sup>1</sup>, Jezreel Pantaleón García<sup>2</sup>, Oliver Kurzai<sup>3,4</sup>, Silke Rebhan<sup>1</sup>, Sabrina Kraus<sup>1</sup>, Elena Pfeuffer-Jovic<sup>5</sup>, Lydia Bussemer<sup>1</sup>, Lotte Possler<sup>6</sup>, Matthias Held<sup>5</sup>, Kerstin Hünninger<sup>3,4</sup>, Olaf Kniemeyer<sup>4</sup>, Sascha Schäuble<sup>4</sup>, Axel A. Brakhage<sup>4,7</sup>, Gianni Panagiotou<sup>4</sup>, P. Lewis White<sup>8</sup>, Hermann Einsele<sup>1</sup>, Jürgen Löffler<sup>1,\$,\*</sup> and Sebastian Wurster<sup>9,\*</sup>

<sup>1</sup>Department of Internal Medicine II, University Hospital of Würzburg, Würzburg, Germany

<sup>2</sup>Department of Pulmonary Medicine, The University of Texas MD Anderson Cancer Center, Houston, Texas, USA

<sup>3</sup>Institute for Hygiene and Microbiology, University of Würzburg, Würzburg, Germany

<sup>4</sup>Leibniz Institute for Natural Product Research and Infection Biology–Hans Knöll Institute, Jena, Germany

<sup>5</sup>Missionsärztliche Klinik Würzburg, Würzburg, Germany

<sup>6</sup>Main-Klinik Ochsenfurt, Würzburg, Germany

<sup>7</sup>Department of Microbiology and Molecular Biology, Institute of Microbiology, Friedrich Schiller University, Jena, Germany

<sup>8</sup>Public Health Wales, Microbiology Cardiff, Wales, UK

<sup>9</sup>Department of Infectious Diseases, Infection Control and Employee Health, The University of Texas MD Anderson Cancer Center, Houston, Texas, USA.

<sup>#</sup>These authors share first authorship

<sup>\$</sup>Requests for materials should be addressed to Jürgen Löffler (Loeffler\_J@ukw.de)

<sup>\*</sup>These authors have contributed equally to this work and are shared last and co-corresponding authors.

### **\* Correspondence:**

Prof. Dr. Jürgen Löffler, [Loeffler\\_J@ukw.de](mailto:Loeffler_J@ukw.de)

Asst. Prof. Dr. Sebastian Wurster, [stwurster@mdanderson.org](mailto:stwurster@mdanderson.org)

**Supplementary Table 1. Preparation of whole blood stimulation tubes for ex-vivo immunoassays.**

|                                                                        | Assay       | $\alpha$ -CD28 | $\alpha$ -CD49d | AfuLy          | AfuG                               | RarLy          | RarG                               | PrS      | PHA           | RPMI           |
|------------------------------------------------------------------------|-------------|----------------|-----------------|----------------|------------------------------------|----------------|------------------------------------|----------|---------------|----------------|
| <b>Concentration in ready-to-use stimulation tubes</b>                 | n/a         | 2 $\mu$ g/mL   | 2 $\mu$ g/mL    | 100 $\mu$ g/mL | 1 $\times$ 10 <sup>6</sup> AfuG/mL | 100 $\mu$ g/mL | 1 $\times$ 10 <sup>6</sup> RarG/mL | 1.2 nmol | 10 $\mu$ g/mL | Ad 500 $\mu$ L |
| <b>Final concentration after injection of 500 <math>\mu</math>L WB</b> | n/a         | 1 $\mu$ g/mL   | 1 $\mu$ g/mL    | 50 $\mu$ g/mL  | 5 $\times$ 10 <sup>5</sup> AfuG/mL | 50 $\mu$ g/mL  | 5 $\times$ 10 <sup>5</sup> RarG/mL | 0.6 nmol | 5 $\mu$ g/mL  | n/a            |
| <b>Unstimulated control</b>                                            | AI, Cyt     | X              | X               |                |                                    |                |                                    |          |               | X              |
|                                                                        | II          |                |                 |                |                                    |                |                                    |          |               | X              |
| <b>AfuLy stimulation</b>                                               | AI, Cyt     | X              | X               | X              |                                    |                |                                    |          |               | X              |
| <b>AfuG stimulation</b>                                                | II          |                |                 |                | X                                  |                |                                    |          |               | X              |
| <b>RarLy stimulation</b>                                               | AI, Cyt     | X              | X               |                |                                    | X              |                                    |          |               | X              |
| <b>RarG stimulation</b>                                                | II          |                |                 |                |                                    |                | X                                  |          |               | X              |
| <b>PrS stimulation</b>                                                 | AI, Cyt     | X              | X               |                |                                    |                |                                    | X        |               | X              |
|                                                                        | II          |                |                 |                |                                    |                |                                    | X        |               | X              |
| <b>AfuLy + PrS stimulation</b>                                         | AI, Cyt     | X              | X               | X              |                                    |                |                                    | X        |               | X              |
| <b>AfuG + PrS stimulation</b>                                          | II          |                |                 |                | X                                  |                |                                    | X        |               | X              |
| <b>Positive control</b>                                                | AI, II, Cyt |                |                 |                |                                    |                |                                    |          | X             | X              |

X indicates that the compound was used for the respective condition.

Abbreviations: AfuLy = *A. fumigatus* mycelial lysate, RarLy = *R. arrhizus* mycelial lysate, CD = cluster of differentiation, n/a = not applicable, PrS = SARS-CoV-2 Protein S (Alpha variant), PHA = phytohemagglutinin, RPMI = Roswell Park Memorial Institute medium, WB = whole blood, AI = adaptive immunity, II = innate immunity, Cyt = multiplex cytokine assay.

**Supplementary Table 2. Antibodies used for flow cytometric analyses.**

| Name                     | Fluorochrome      | Clone   | Provider        | Catalogue number | Panel(s)          |
|--------------------------|-------------------|---------|-----------------|------------------|-------------------|
| <b>CD1c (BDCA-1)</b>     | PerCP-Vio700      | REA694  | Miltenyi Biotec | 130-110-538      | DC                |
| <b>CD3</b>               | PE-Vio615         | REA613  | Miltenyi Biotec | 130-114-520      | ID                |
| <b>CD4</b>               | VioGreen          | REA623  | Miltenyi Biotec | 130-113-230      | T1, T2            |
| <b>CD8</b>               | PerCP-Vio700      | REA734  | Miltenyi Biotec | 130-110-682      | T1, T2            |
| <b>CD11b</b>             | APC               | REA713  | Miltenyi Biotec | 130-110-554      | GR                |
| <b>CD14</b>              | APC-Vio770        | TÜK4    | Miltenyi Biotec | 130-113-144      | ID, DC            |
| <b>CD16</b>              | VioGreen          | REA423  | Miltenyi Biotec | 130-113-397      | ID, GR            |
| <b>CD19</b>              | PE                | REA675  | Miltenyi Biotec | 130-113-646      | ID                |
| <b>CD45RA</b>            | PE-Vio615         | REA1047 | Miltenyi Biotec | 130-117-745      | T2                |
| <b>CD56</b>              | FITC              | REA196  | Miltenyi Biotec | 130-114-549      | ID                |
| <b>CD62L</b>             | PE                | REA615  | Miltenyi Biotec | 130-113-625      | GR                |
| <b>CD66b</b>             | PerCP-Vio700      | REA306  | Miltenyi Biotec | 130-119-768      | ID, GR            |
| <b>CD69</b>              | APC-Vio770        | REA824  | Miltenyi Biotec | 130-112-616      | T1, T2            |
| <b>CD83</b>              | FITC/VioBright515 | REA714  | Miltenyi Biotec | 130-110-507      | DC                |
| <b>CD107a (LAMP-1)</b>   | APC/R667          | REA792  | Miltenyi Biotec | 130-111-626      | T2                |
| <b>CD154</b>             | FITC/VioBright515 | REA238  | Miltenyi Biotec | 130-122-800      | T1, T2            |
| <b>CD183 (CXCR3)</b>     | APC               | REA232  | Miltenyi Biotec | 130-120-450      | T1                |
| <b>CD194 (CCR4)</b>      | PE                | REA279  | Miltenyi Biotec | 130-120-456      | T1                |
| <b>CD196 (CCR6)</b>      | PE-Vio615         | REA190  | Miltenyi Biotec | 130-120-459      | T1                |
| <b>CD197 (CCR7)</b>      | PE                | REA546  | Miltenyi Biotec | 130-119-583      | T2                |
| <b>CD253 (TRAIL)</b>     | PE-Vio615         | REA1113 | Miltenyi Biotec | 130-119-286      | GR, DC            |
| <b>CD279 (PD-1)</b>      | PE-Vio770         | REA1165 | Miltenyi Biotec | 130-120-385      | T1, T2            |
| <b>CD284 (TLR4)</b>      | APC               | HTA125  | Miltenyi Biotec | 130-096-236      | DC                |
| <b>Dectin-1</b>          | PE                | REA515  | Miltenyi Biotec | 130-121-993      | DC                |
| <b>DHR 123</b>           | FITC              |         | Sigma-Aldrich   | D1054            | GR                |
| <b>HLA-DR</b>            | VioGreen          | REA805  | Miltenyi Biotec | 130-111-948      | DC                |
| <b>Ki-67</b>             | AlexaFluor700     | Ki-67   | BioLegend       | 350530           | T1, T2            |
| <b>Viability 405/452</b> | PB450/VioBlue     |         | Miltenyi Biotec | 130-110-205      | ID, T1,T2, GR, DC |

Abbreviations: ID = immune cell distribution panel, GR = granulocyte panel, DC = dendritic cells panel, T1 = T cell panel 1, T2 = T cell panel 2. All antibodies/dyes were used at 2% v/v, except for Ki-67 (5% v/v), DHR 123 (1% v/v), and Viability 405/452 (1% v/v).

**Supplementary Table 3. Utilization of blood samples for downstream readouts.**

| Assay                                  | Flow cytometry |              |            |         |         | Cytokine assay   |           |
|----------------------------------------|----------------|--------------|------------|---------|---------|------------------|-----------|
|                                        | Panel          | ID           | T1 & T2    | GR & DC | T1 & T2 | GR & DC          | Multiplex |
| Stimulus                               | n/a            | Afu          | Afu        | Rar     | Rar     | Afu              | Rar       |
| Figures                                | 1C             | 1D-E<br>2C-H | 4A-C*      | S6      | 5E-F    | 3A-D<br>S1<br>S2 | 5A-D      |
| Patient 1 (Alpha)                      | X              | X            | X          |         |         | X                |           |
| Patient 2 (Alpha)                      | X              | X            | X          |         |         | X                |           |
| Patient 3 (Alpha)                      | X              | X            | X          |         |         | X                |           |
| Patient 4 (Alpha)                      | X              | X            | X          |         |         | X                |           |
| Patient 5 (Delta)                      | X              | X            | X          | X       |         | X                |           |
| Patient 6 (Delta)                      | X              | X            | X          | X       | X       | X                | X         |
| Patient 7 (Delta)                      | X              | X            | X          | X       | X       | X                | X         |
| Patient 8 (Delta)                      | X              | X            | X          | X       | X       | X                | X         |
| Patient 9 (Delta)                      | X              | X            | X          | X       | X       | X                | X         |
| Patient 10 (Delta)                     | X              | X            | X          | X       | X       | X                | X         |
| Patient 11 (Delta)                     | X              | X            | X          | X       | X       | X                | X         |
| Patient 12 (Delta)                     | X              | X            | X          | X       | X       | X                | X         |
| <b>Total number of patient samples</b> | 12             | 12           | 12         | 8       | 7       | 12               | 7         |
| Control 1                              | X              | X            | X *        | X       | X       | X                | X         |
| Control 2                              | X              | X            | X *        | X       | X       | X                | X         |
| Control 3                              | X              |              | X *        |         |         | X                |           |
| Control 4                              | X              |              | X *        |         |         | X                |           |
| Control 5                              | X              | X            | X *        | X       | X       | X                | X         |
| Control 6                              | X              | X            | X *        | X       | X       | X                | X         |
| Control 7                              | X              | X            | X *        |         |         | X                |           |
| Control 8                              | X              | X            | X *        | X       | X       | X                | X         |
| Control 9                              | X              | X            | X          | X       | X       |                  | X         |
| <b>Total number of control samples</b> | 9              | 7            | 9<br>(8) * | 6       | 6       | 8                | 6         |

Footnotes and abbreviations on following page.

Footnotes and abbreviations for **Supplementary Table 3**:

X indicates that the subject/sample was included in the respective analyses and figures.

\* indicates that the sample was additionally used for co-stimulation experiments with *A. fumigatus* lysate and SARS-CoV-2 protein S.

The fungal killing assays (**Fig. 4D** and **Fig. 5G**), performed after the main analysis, utilized all Delta patient samples and an independent cohort of 6 additional control subjects.

Abbreviations: ID = immune cell distribution panel, T1 = T cell panel 1, T2 = T cell panel 2, GR = granulocyte panel, DC = dendritic cells panel, n/a = not applicable, Afu = *Aspergillus fumigatus*, Rar = *Rhizopus arrhizus*.

## **Gating strategy**

### **Gating strategy to study global and mold antigen-reactive T-cell responses.**

Single cells were gated based on SSC-A, FSC-A, and FSC-H properties. Lymphocytes were identified by light scatter properties and dead lymphocytes were excluded by Live/Dead staining. CD4<sup>+</sup>, CD8<sup>bright</sup>, and CD8<sup>dim</sup> cells were differentiated.

In panel T1 (**1<sup>st</sup> figure**), positive cells for activation markers CD154 and CD69, exhaustion marker PD-1, and proliferation marker Ki-67 were gated within each T-cell subpopulation. CD4<sup>+</sup> T-helper (Th) cells were then subdivided into Th1 (CXCR3<sup>+</sup>), Th2 (CXCR3<sup>-</sup> CCR6<sup>-</sup> CCR4<sup>+</sup>), and Th17 (CXCR3<sup>-</sup> CCR6<sup>+</sup> CCR4<sup>+</sup>) cells. Th-cell polarization was also determined for CD154<sup>+</sup>, CD69<sup>+</sup>, PD-1<sup>+</sup> and Ki-67<sup>+</sup> Th cells. Mean fluorescence intensity was determined for all markers.

In panel T2 (**2<sup>nd</sup> figure**), positive cells for activation markers CD154, CD69, and CD107a, exhaustion marker PD-1, and proliferation marker Ki-67 were gated within each T-cell subpopulation. Effector memory T cells (T<sub>EM</sub>, CD45RA<sup>-</sup> CCR7<sup>-</sup>), central memory T cells (T<sub>CM</sub>, CD45RA<sup>-</sup> CCR7<sup>+</sup>), effector T cells (T<sub>EMRA</sub>, CD45RA<sup>+</sup> CCR7<sup>-</sup>) and naïve T cells (T<sub>N</sub>, CD45RA<sup>+</sup> CCR7<sup>+</sup>) were differentiated. Mean fluorescence intensity was determined for all markers.

### **Gating strategy to determine baseline leukocyte distributions and to study mold antigen-induced activation of dendritic cells and granulocytes (3<sup>rd</sup> figure).**

Debris was excluded by light scatter properties and dead cells were excluded by Live/Dead staining. For determination of leukocyte distributions (performed on unstimulated samples), T cells (CD19<sup>-</sup> CD3<sup>+</sup>) and B cells (CD19<sup>+</sup> CD3<sup>-</sup>) were gated. CD19<sup>-</sup> CD3<sup>-</sup> cells were further subdivided into monocytes (CD14<sup>+</sup>) and granulocytes (CD66b<sup>+</sup>). Natural killer (NK) cells were identified as CD3<sup>-</sup> CD56<sup>+</sup> and subdivided into CD56<sup>dim</sup> CD16<sup>+</sup> NK cells and CD56<sup>bright</sup> CD16<sup>low</sup> NK cells. Granulocytes were identified by CD66 expression and analyzed for ROS, CD253, CD16, CD11b, and CD62L expression. Dendritic cells, identified as CD1c<sup>+</sup> cells, were analyzed for Dectin-1, CD253, HLA-DR, CD83, CD284 and CD14 expression. Mean fluorescence intensity was determined for all markers.



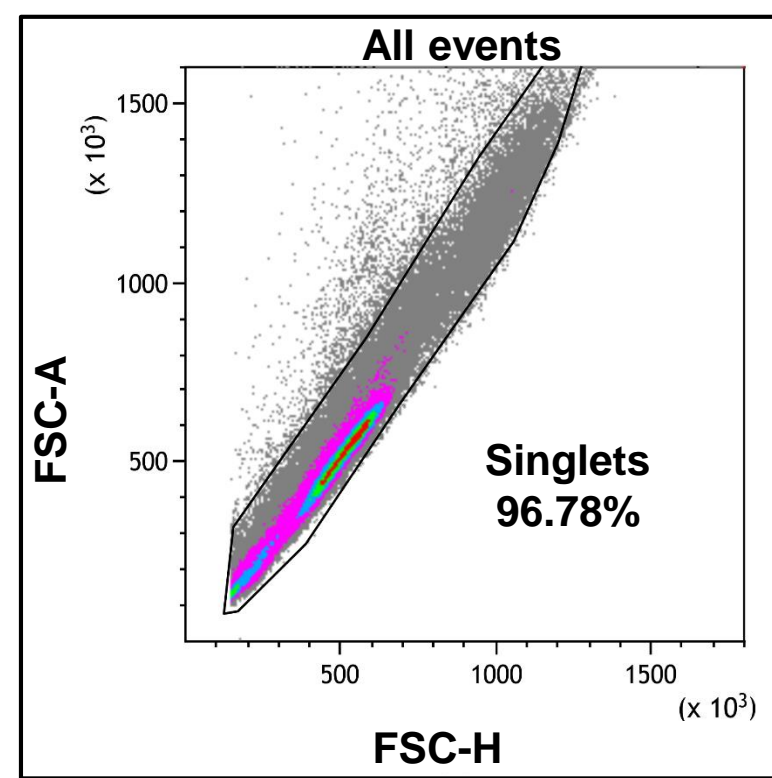

Singlets

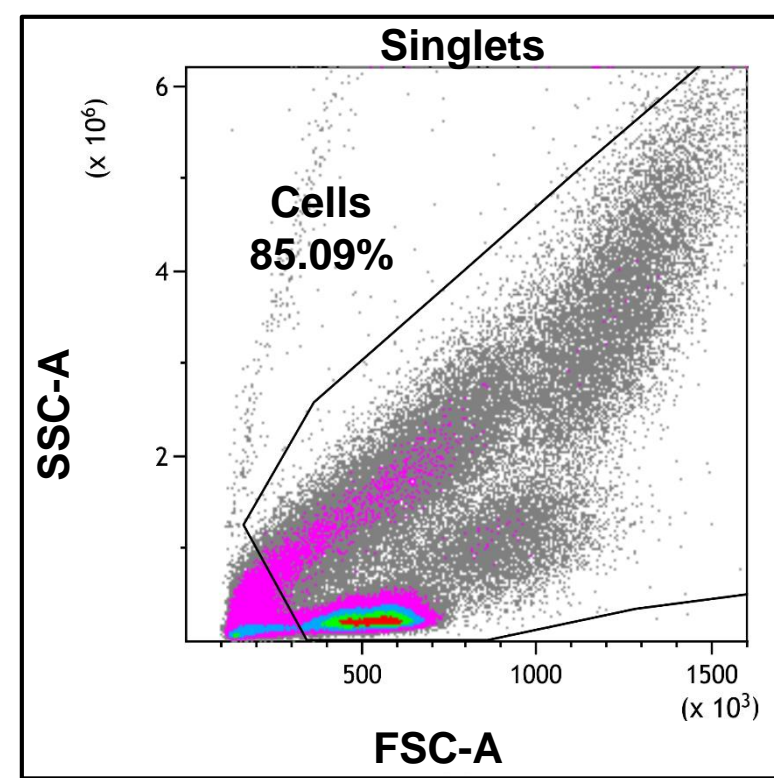

Cells

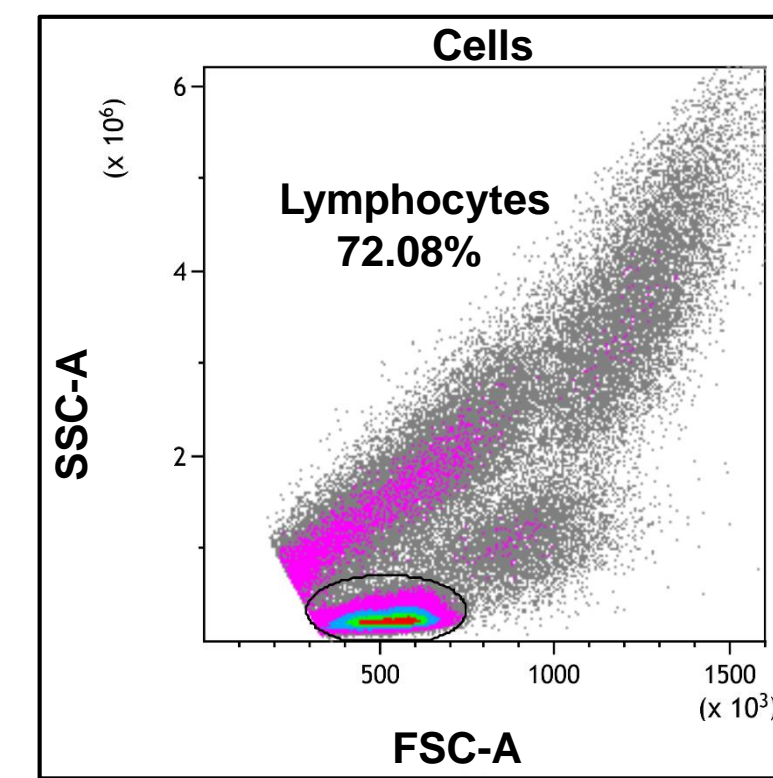

Lymphocytes

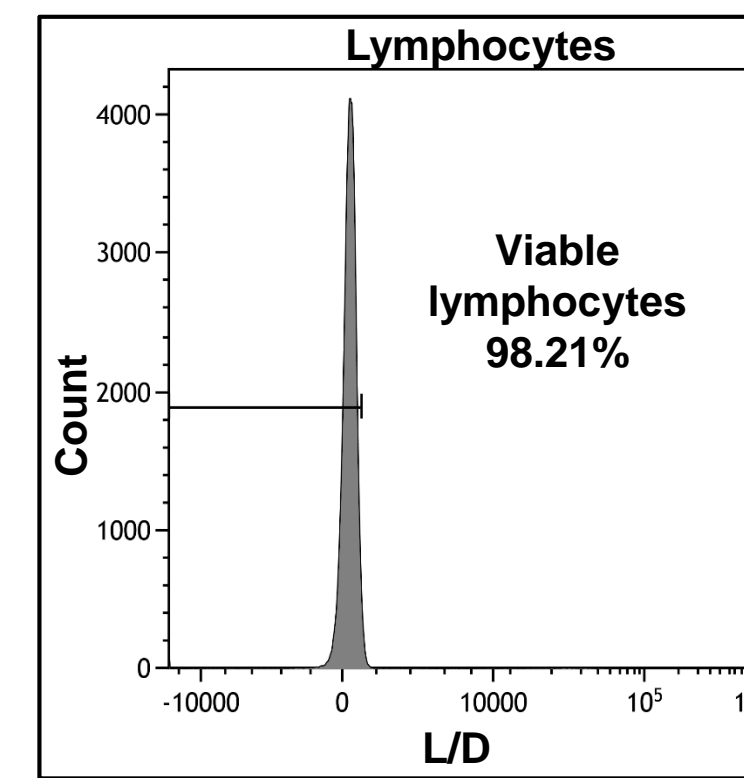

Viable lymphocytes

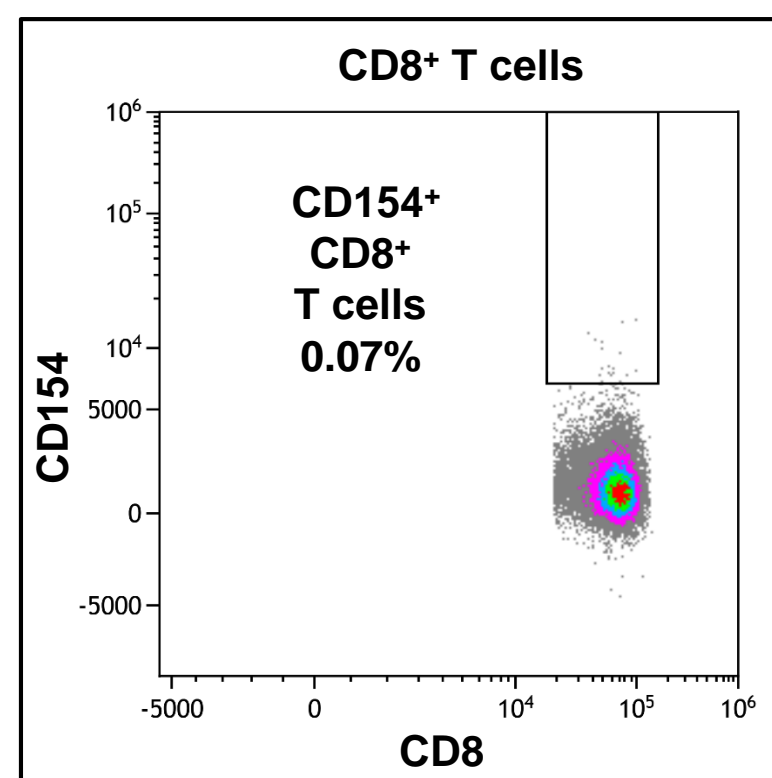

CD8<sup>+</sup> T cells

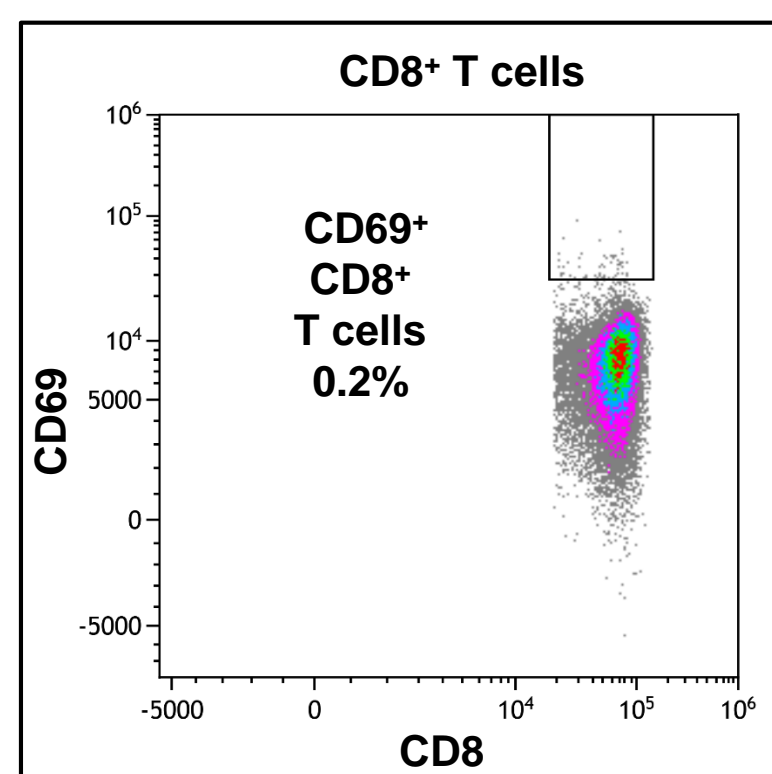

CD8<sup>dim</sup> T cells

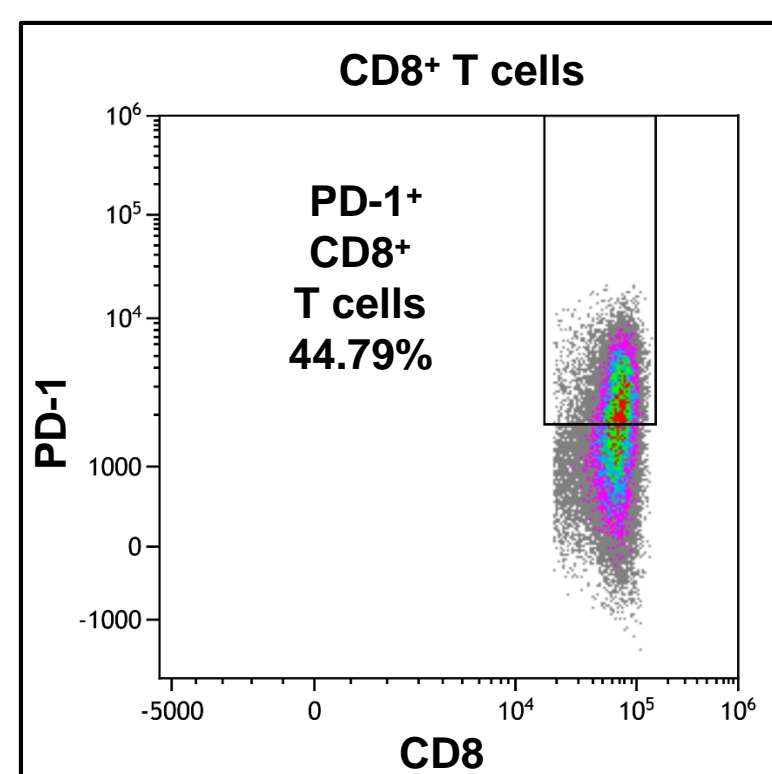

CD8<sup>dim</sup> T cells

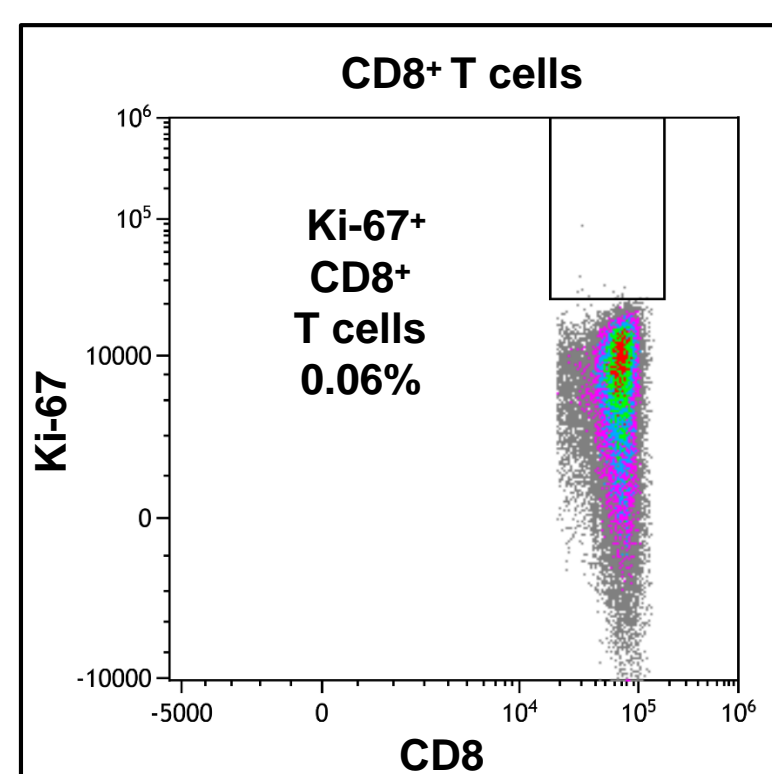

CD8<sup>dim</sup> T cells

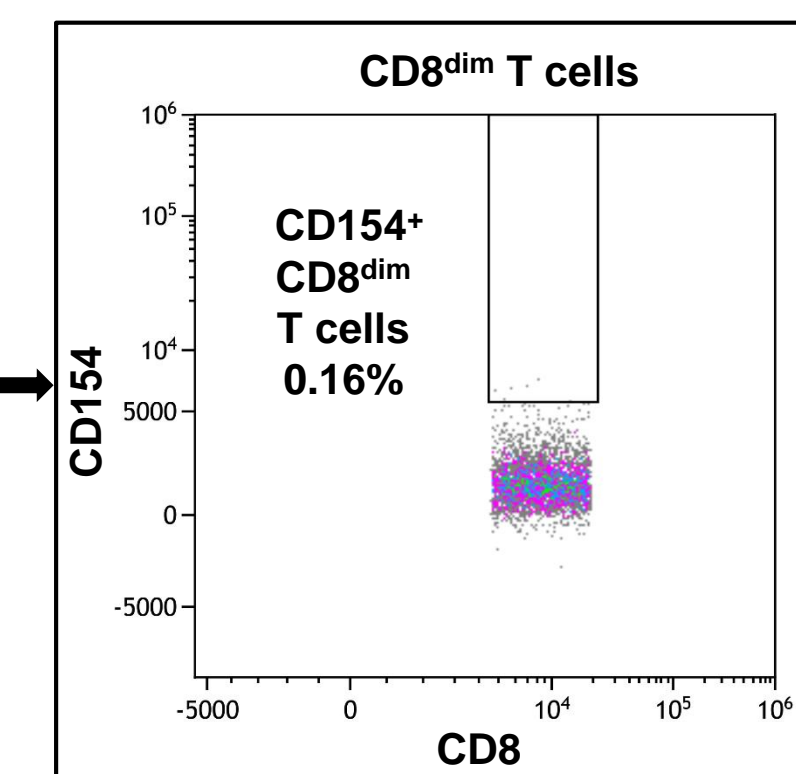

CD8<sup>dim</sup> T cells

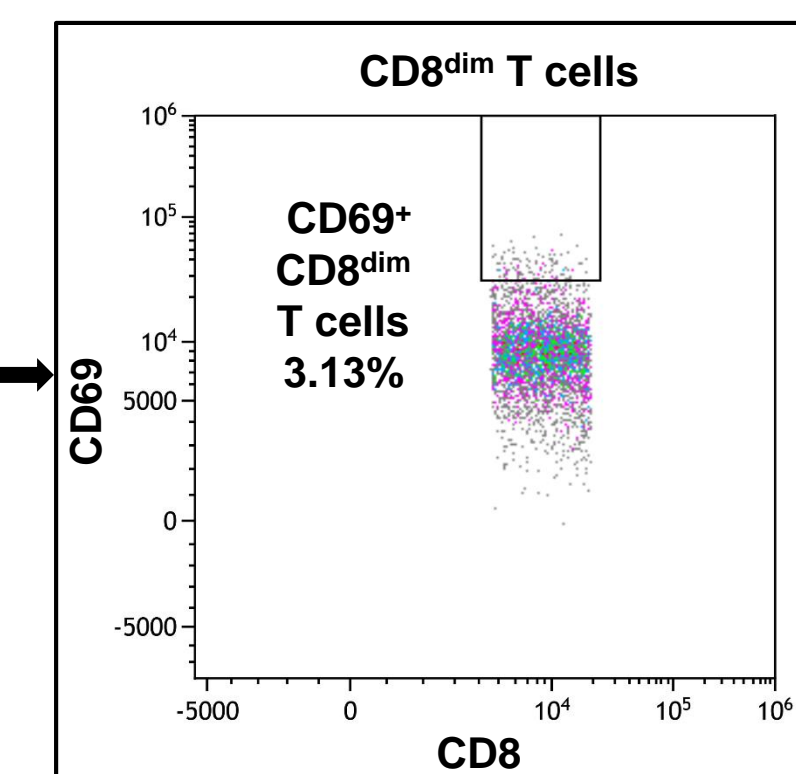

CD8<sup>dim</sup> T cells

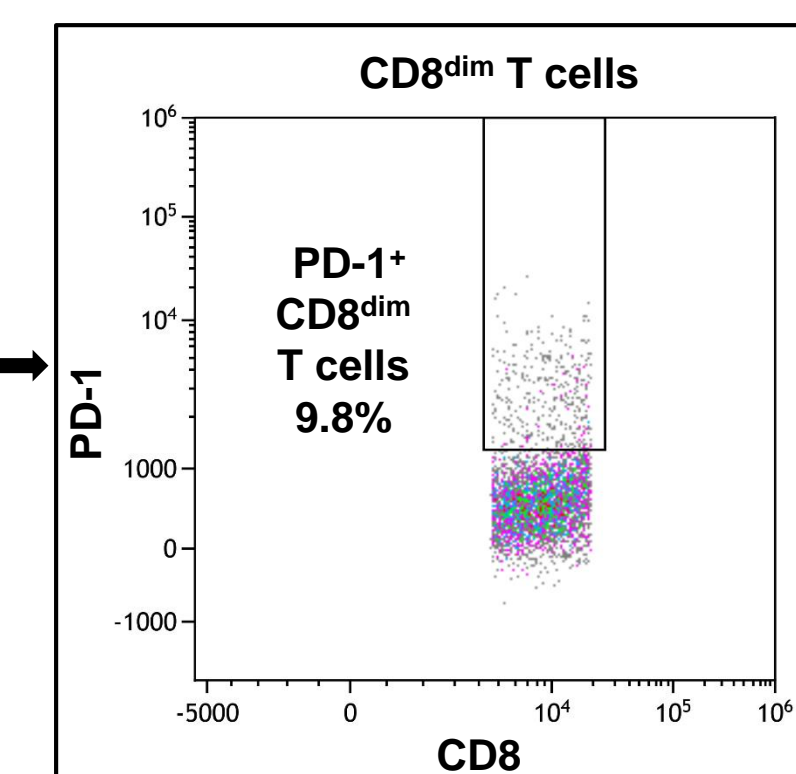

CD8<sup>dim</sup> T cells

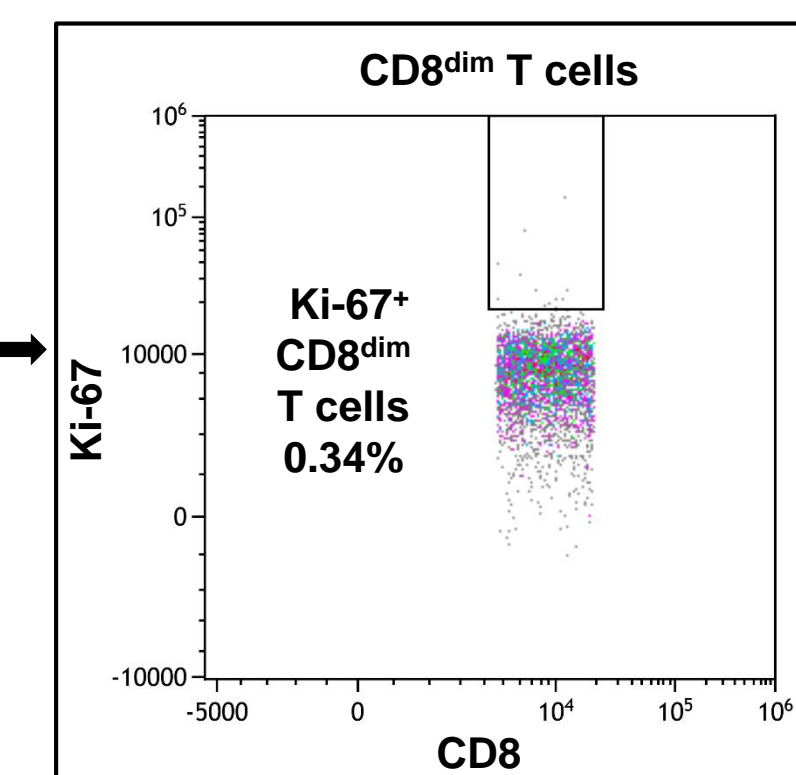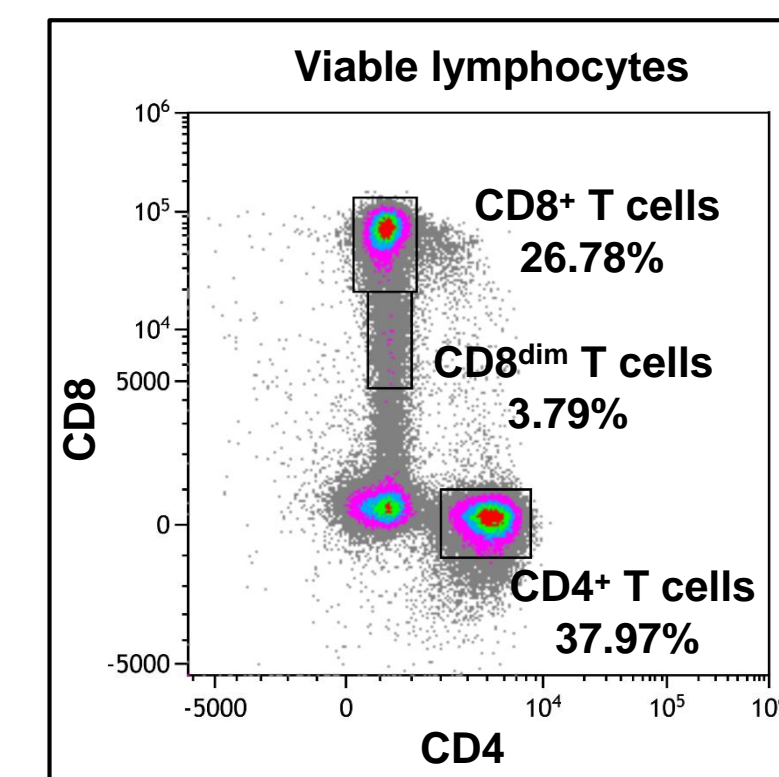

CD4<sup>+</sup> T cells

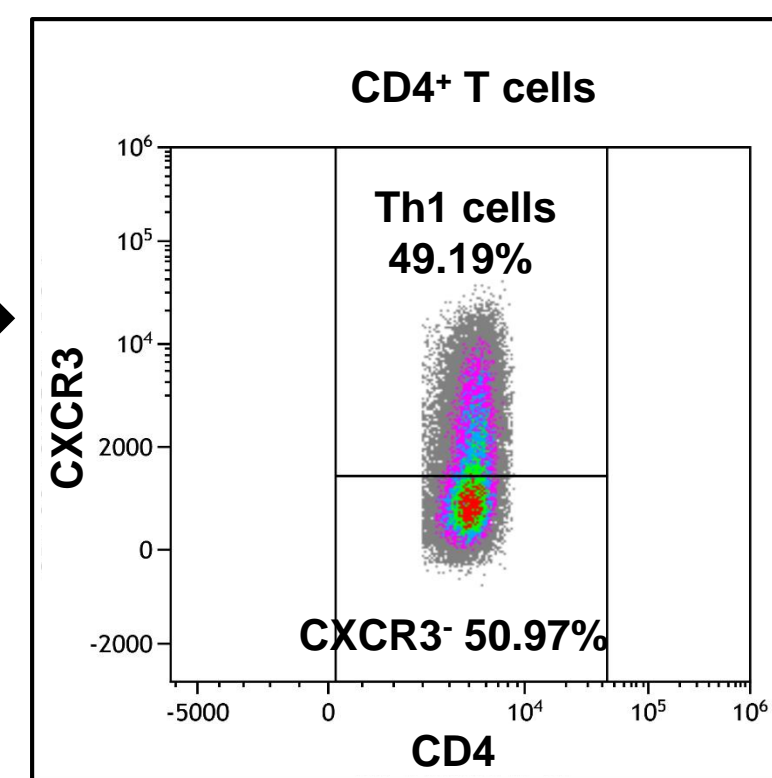

CXCR3<sup>-</sup>

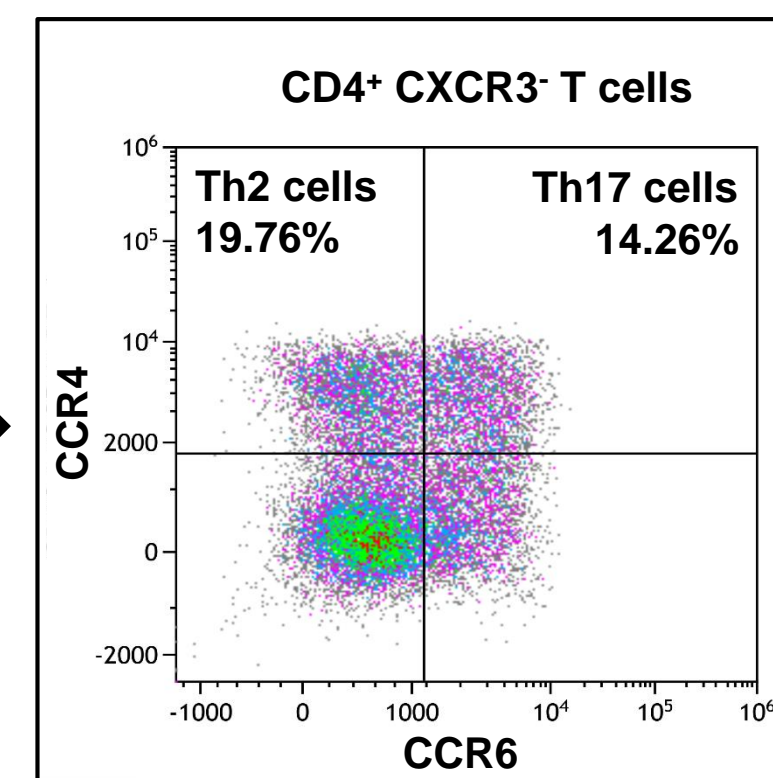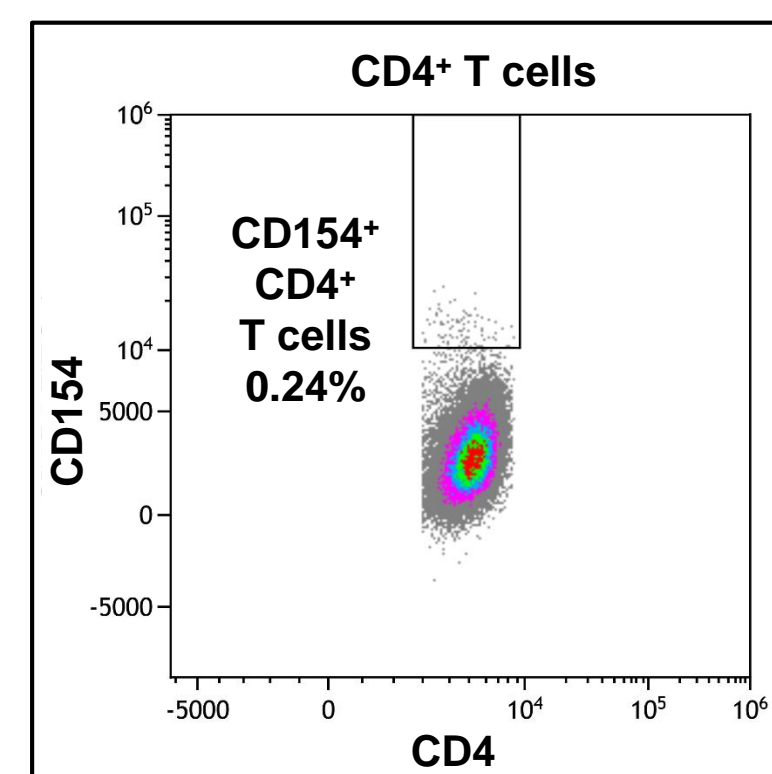

CD154<sup>+</sup>

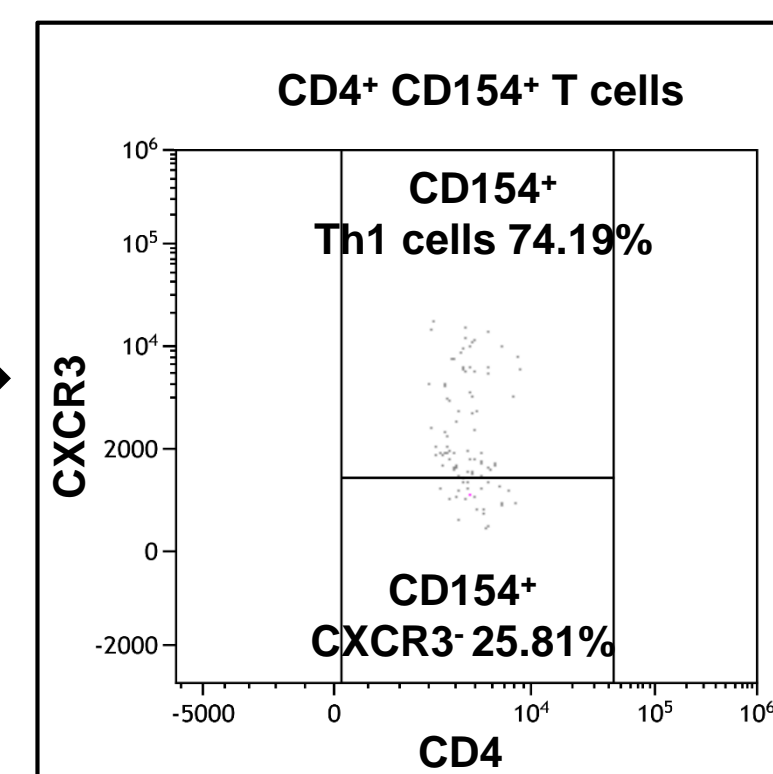

CXCR3<sup>-</sup>

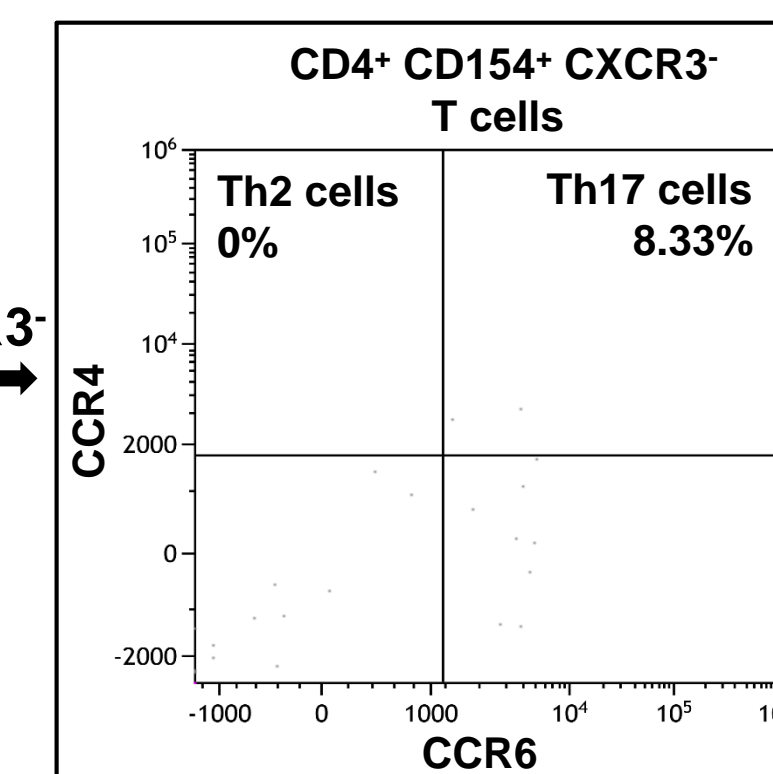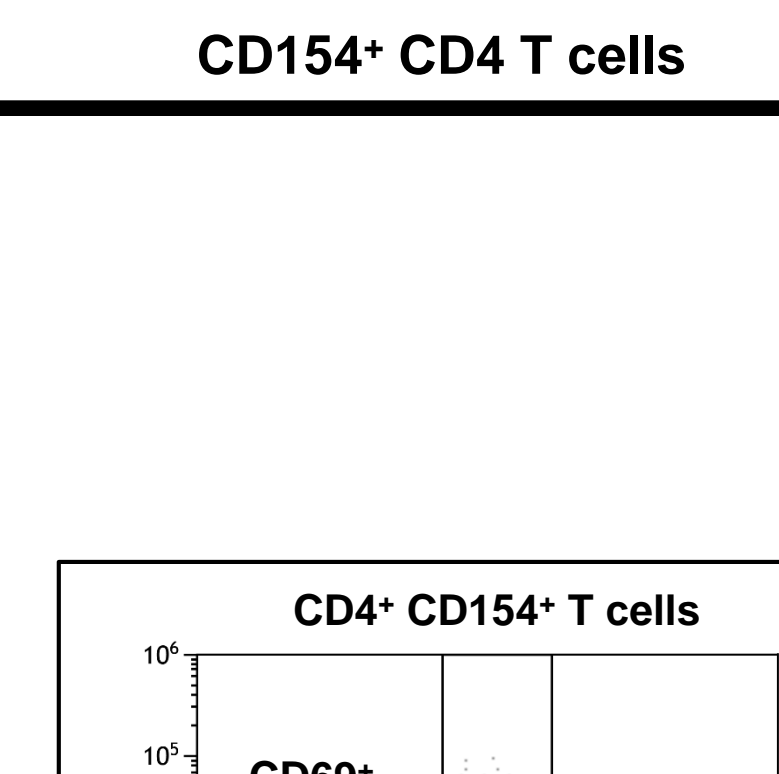

CD69<sup>+</sup>

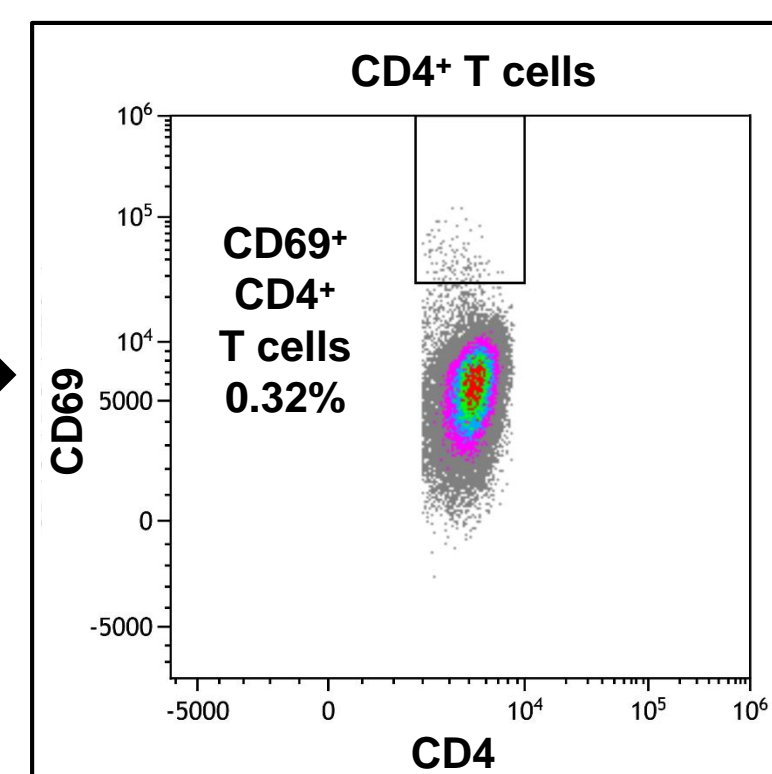

CD69<sup>+</sup>

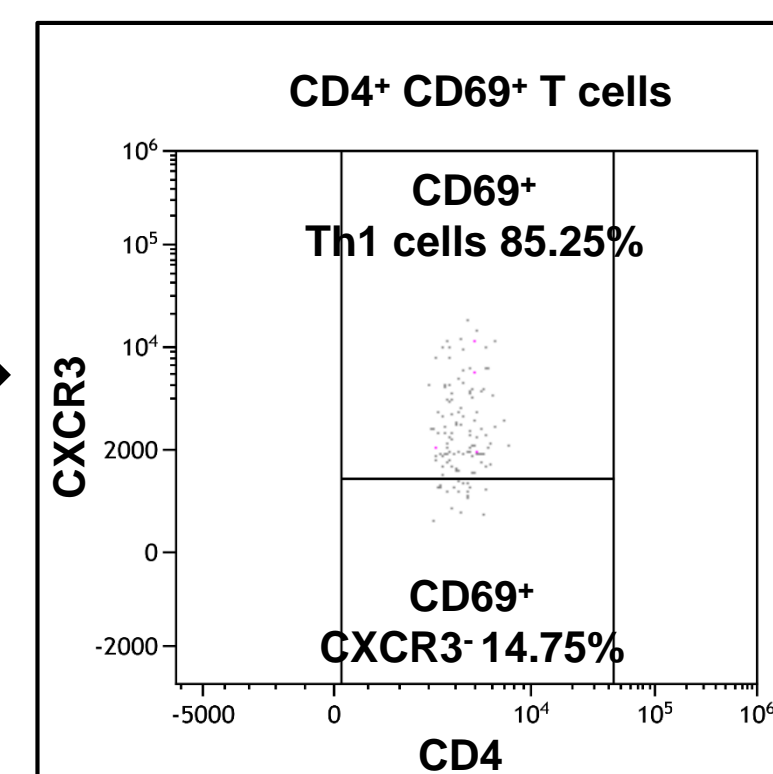

CXCR3<sup>-</sup>

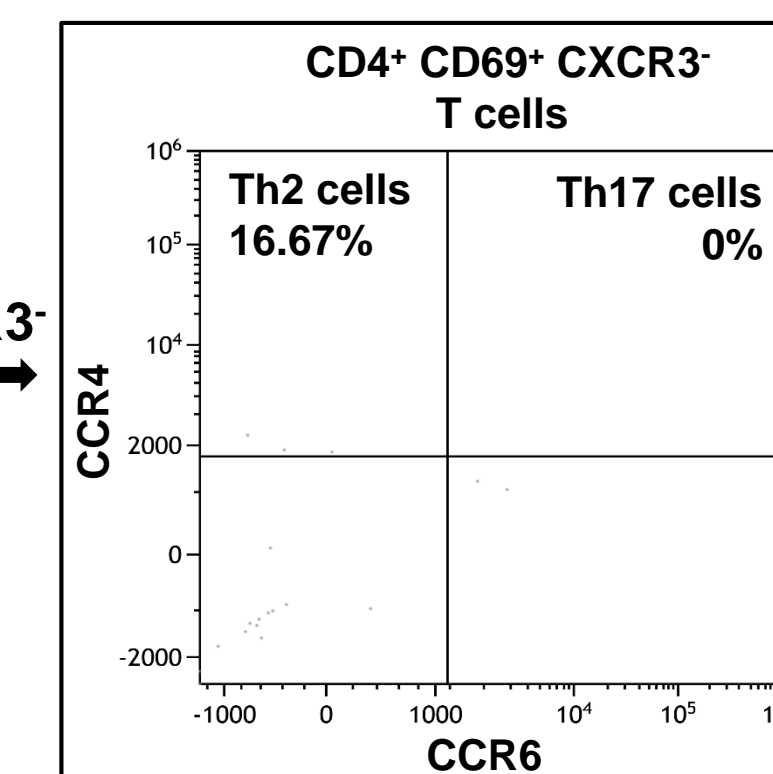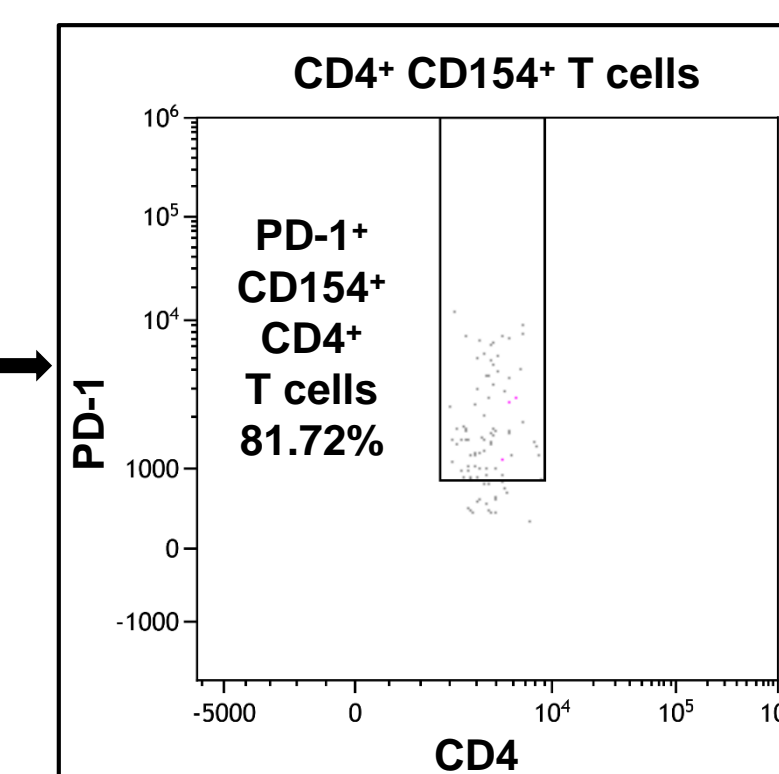

PD-1<sup>+</sup>

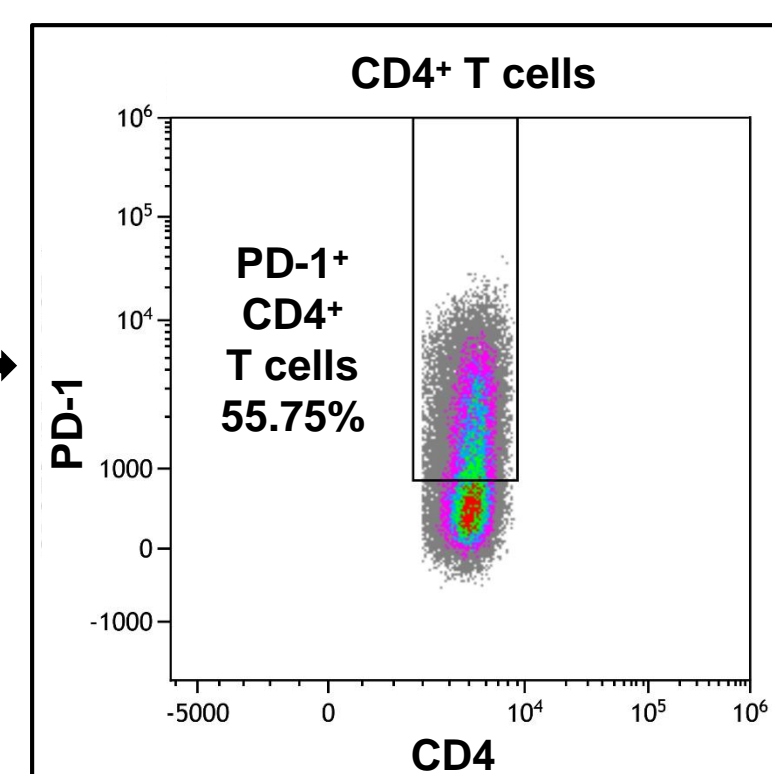

PD-1<sup>+</sup>

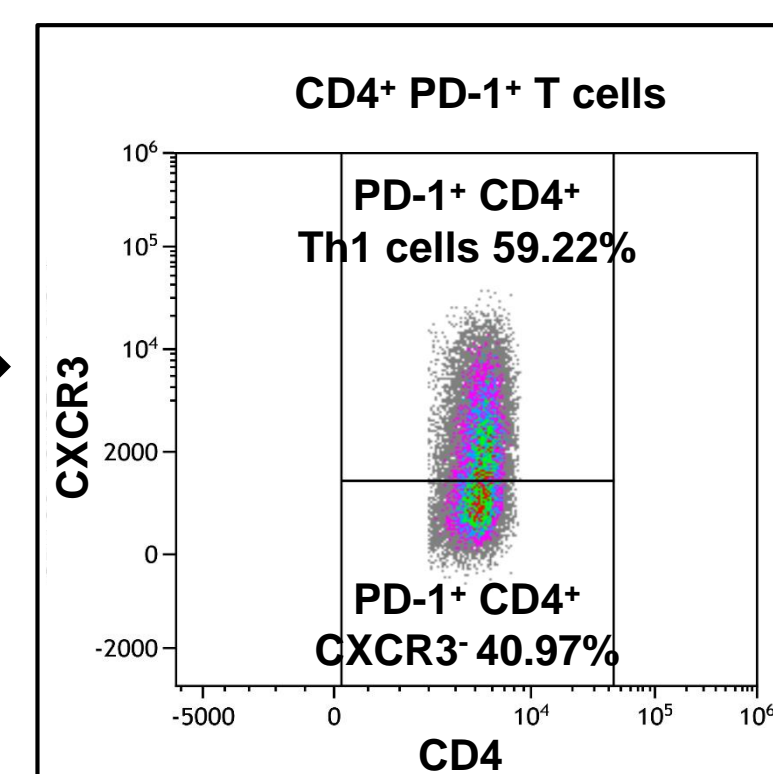

CXCR3<sup>-</sup>

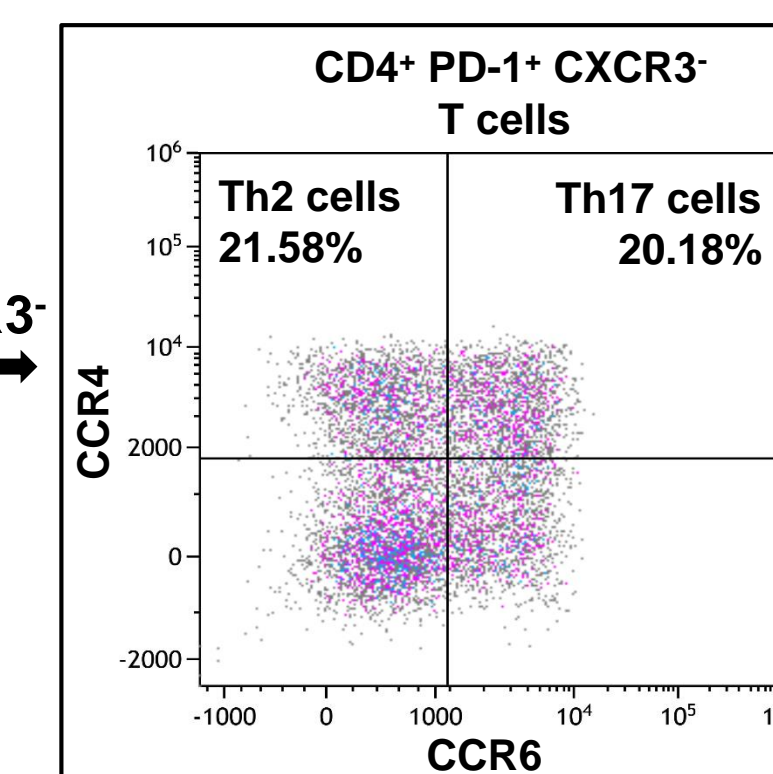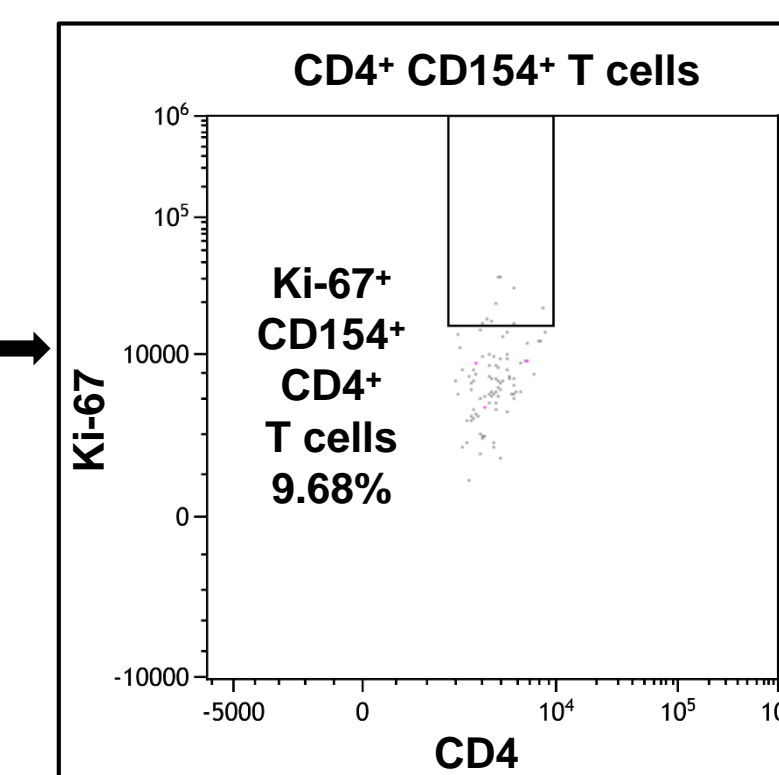

Ki-67<sup>+</sup>

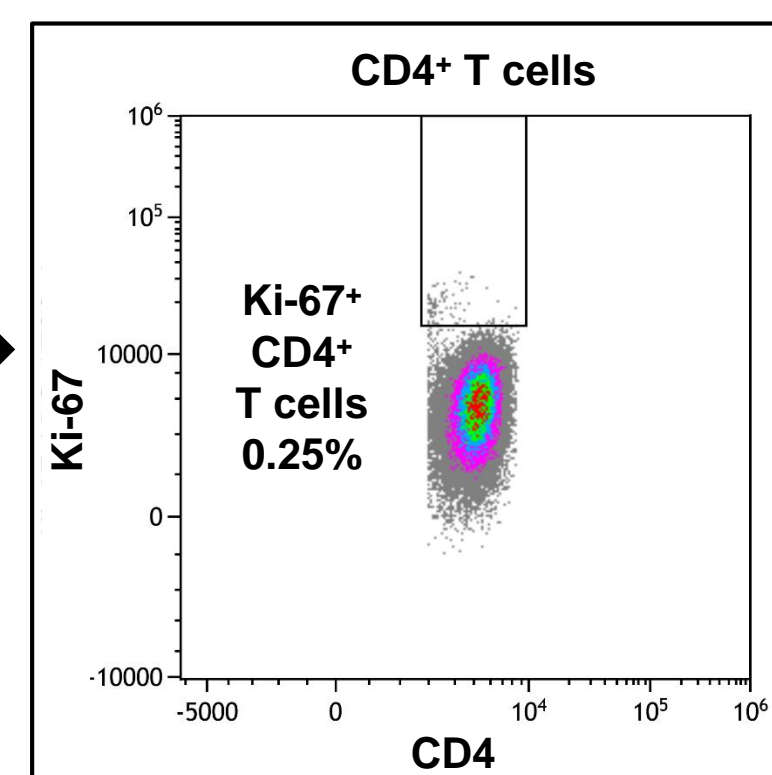

Ki-67<sup>+</sup>

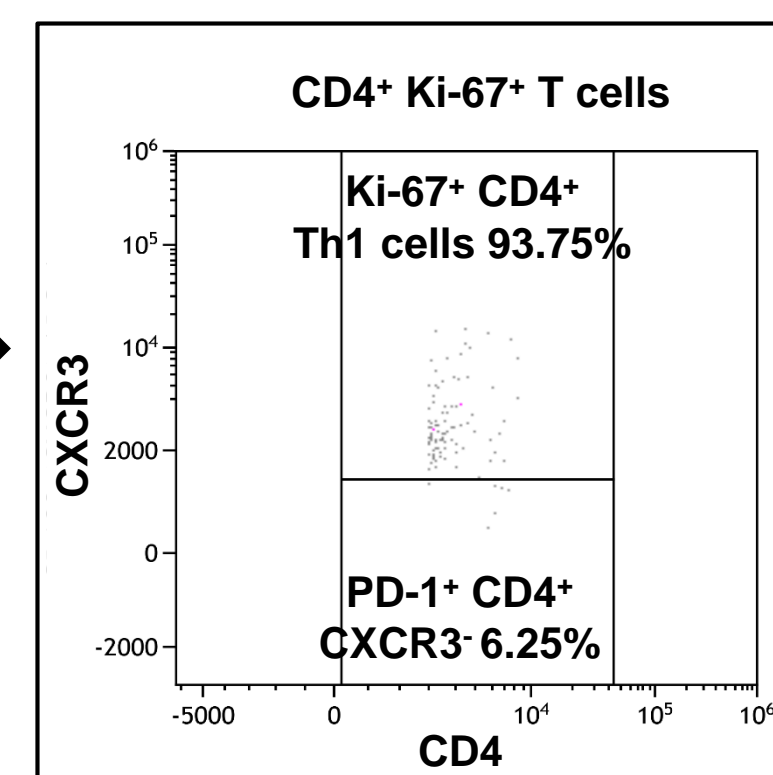

CXCR3<sup>-</sup>

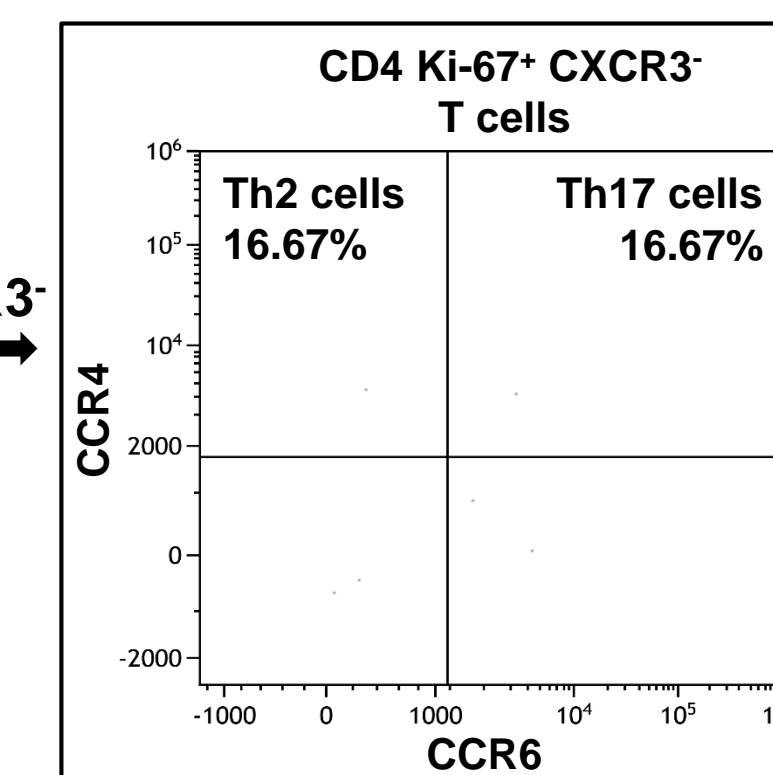



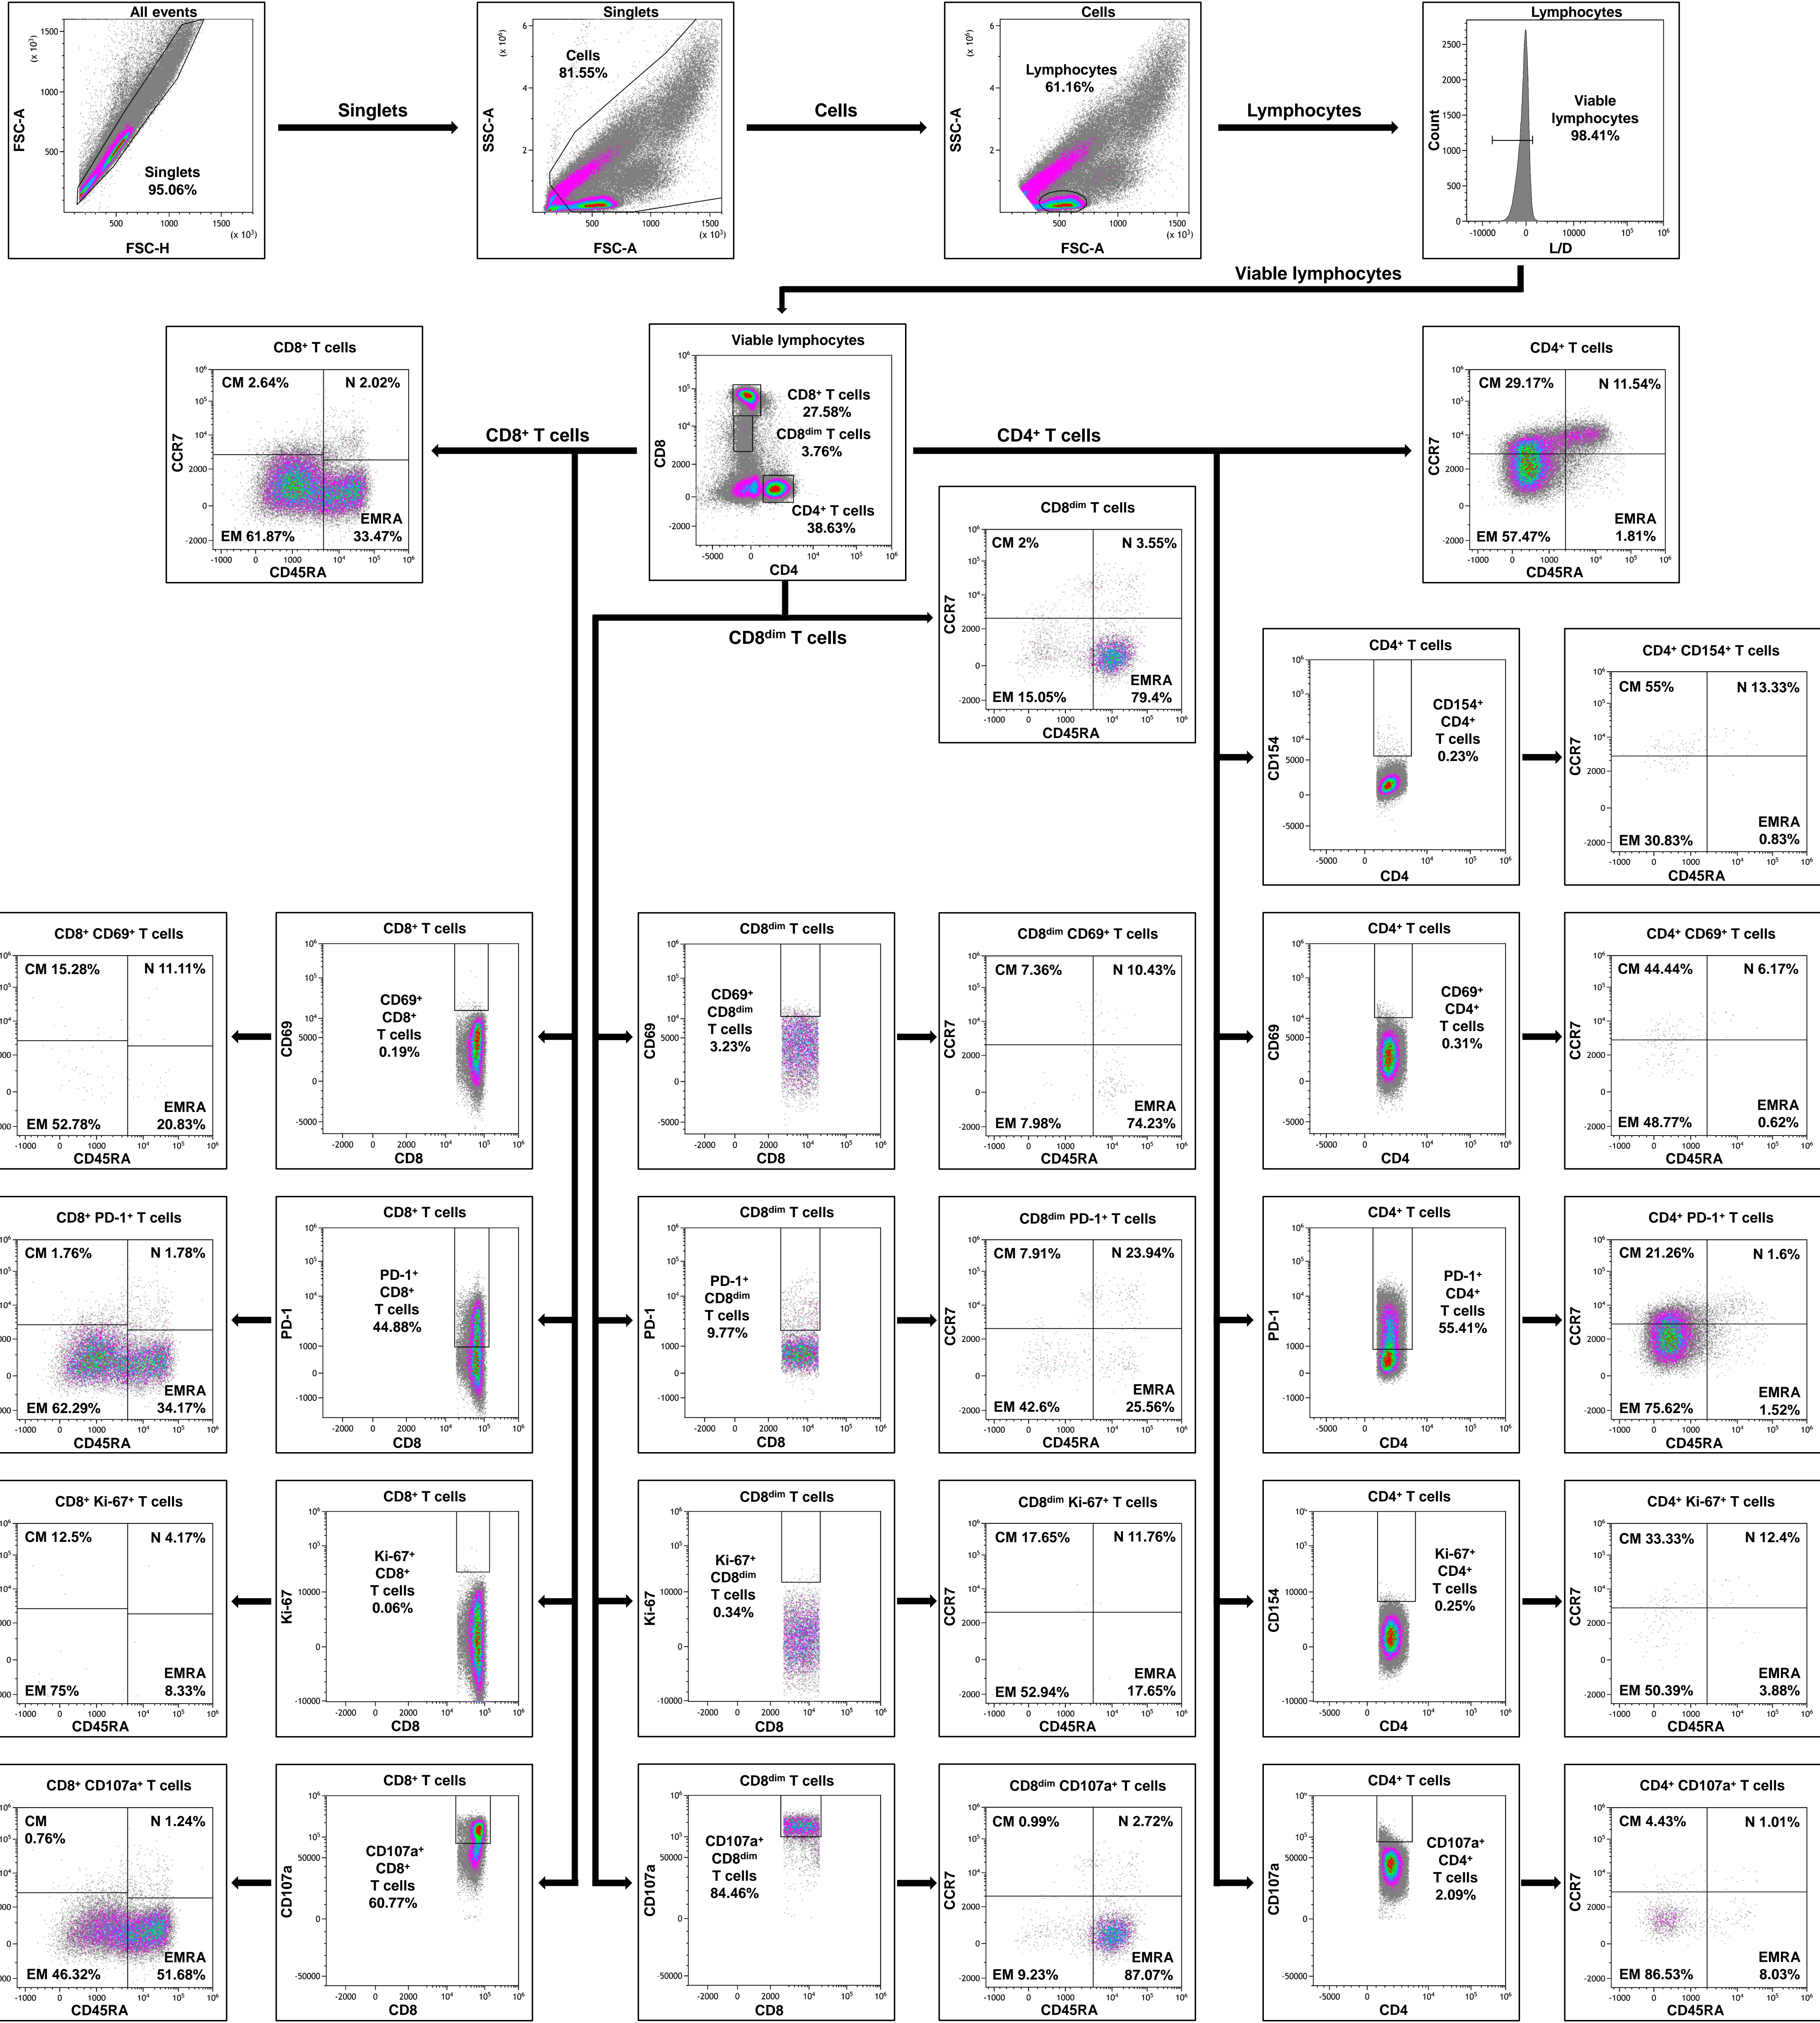



### Immune cell distribution (Flow panel ID)

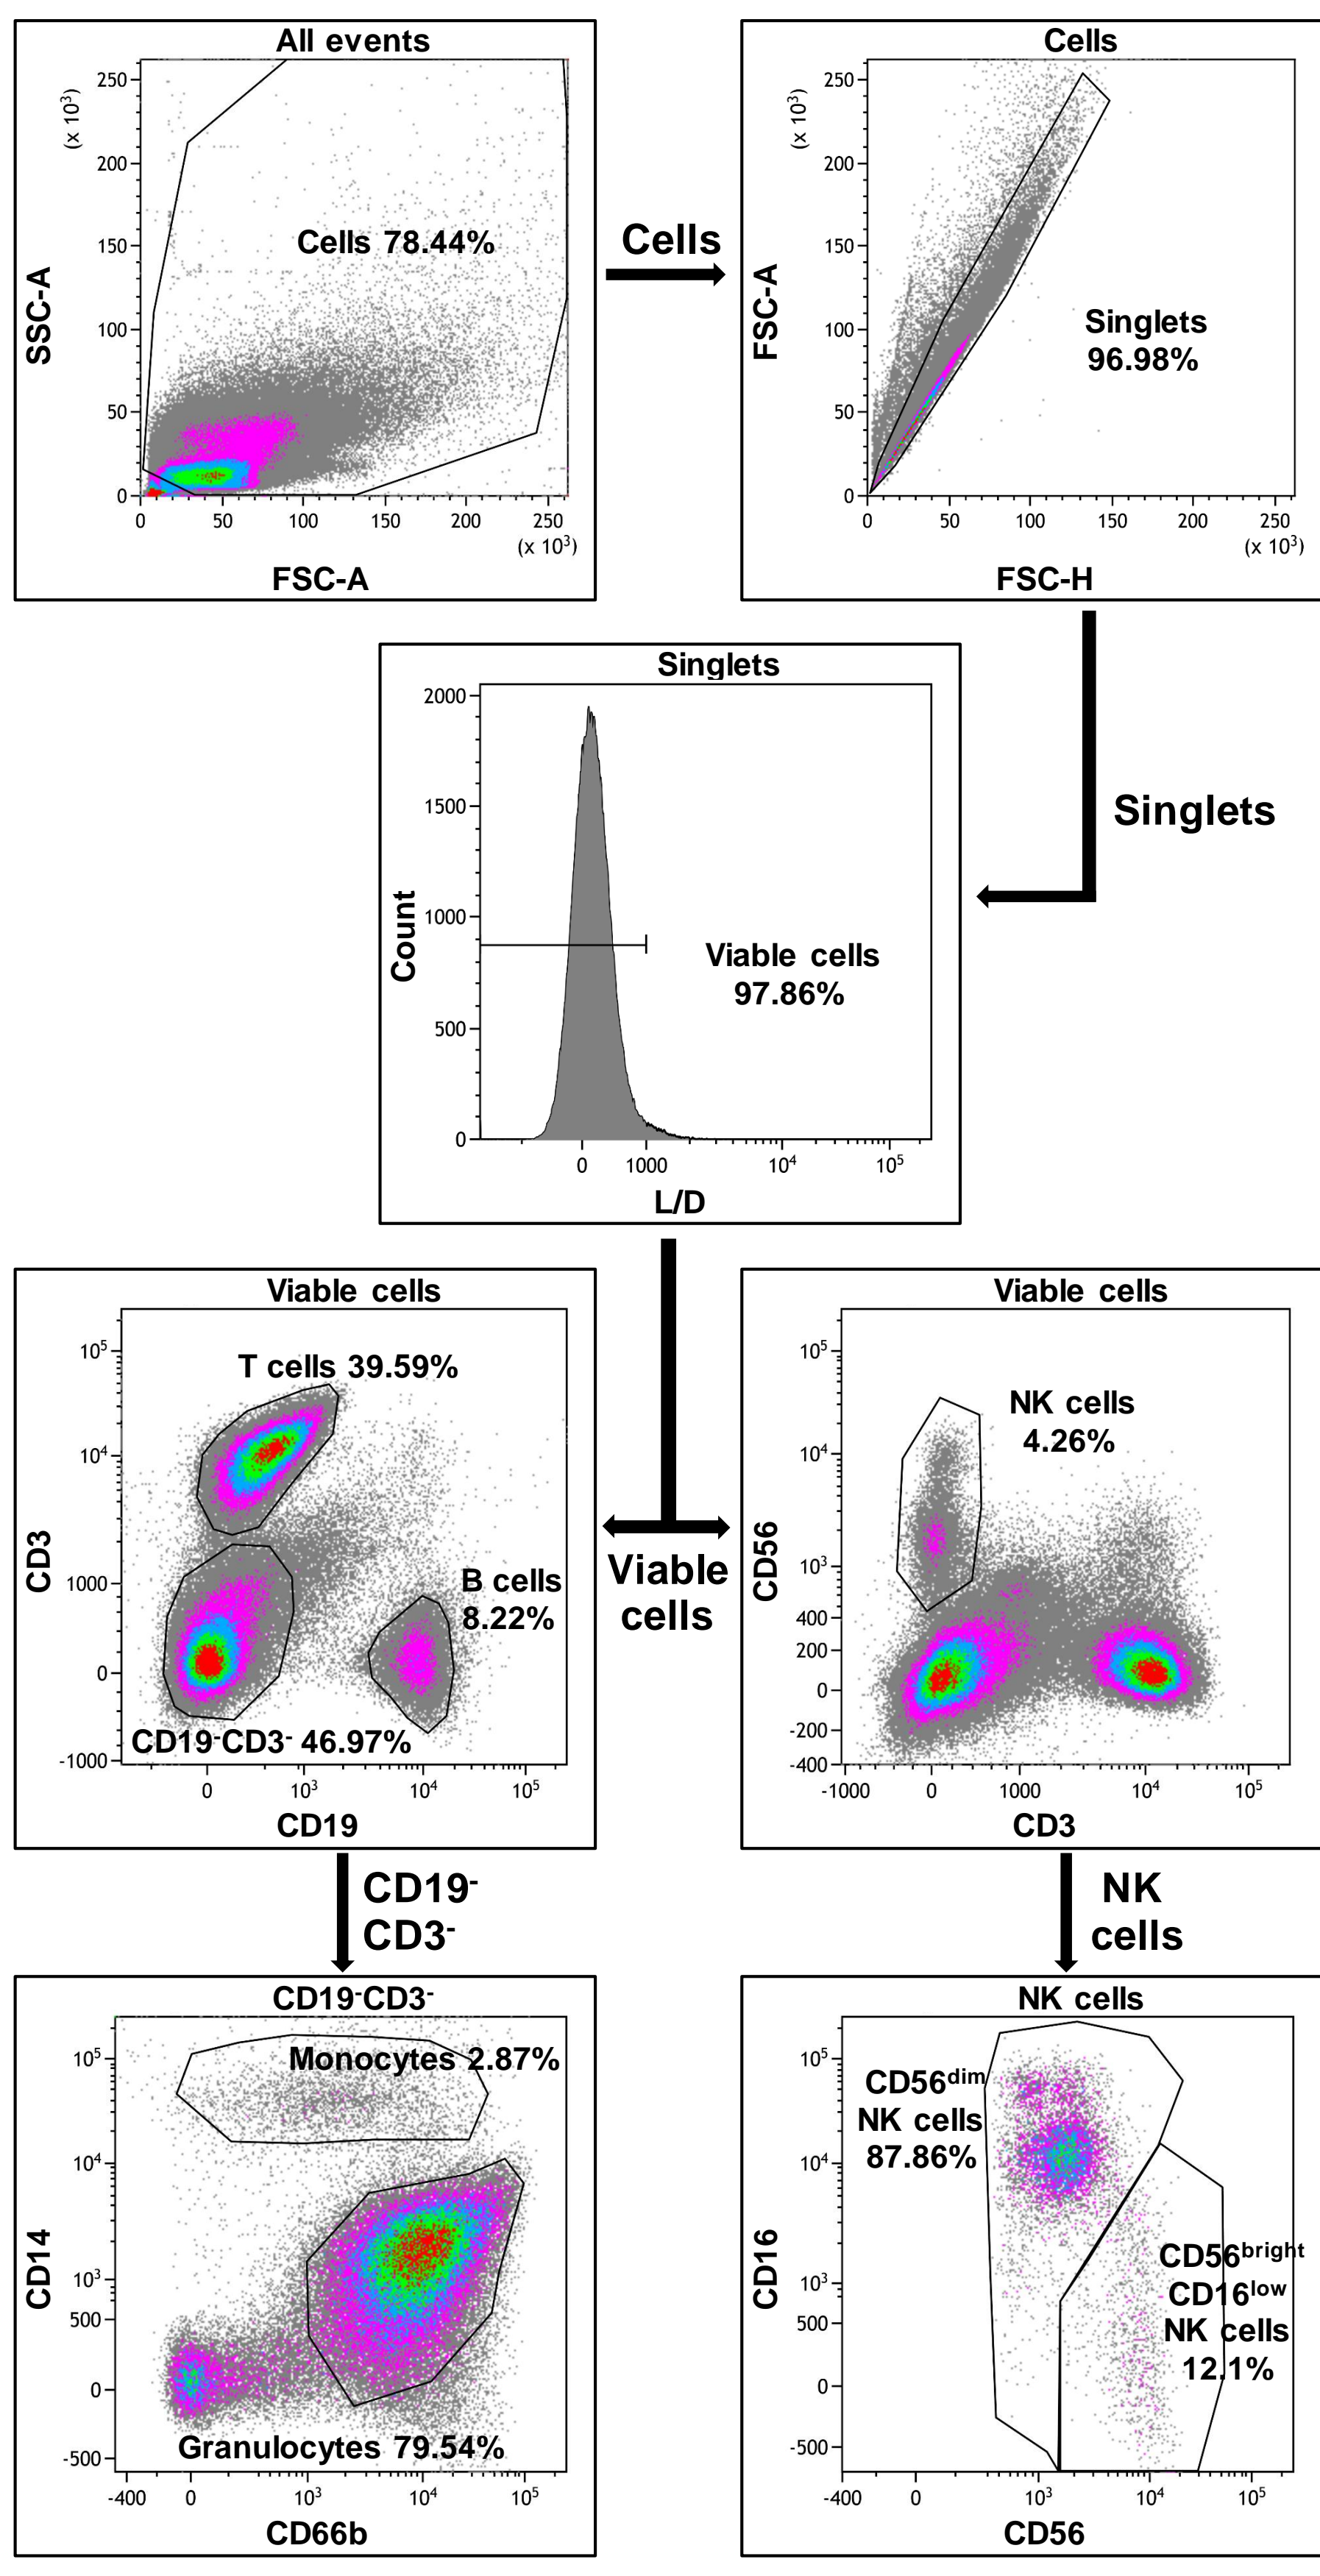

### Granulocytes (Flow panel GR)

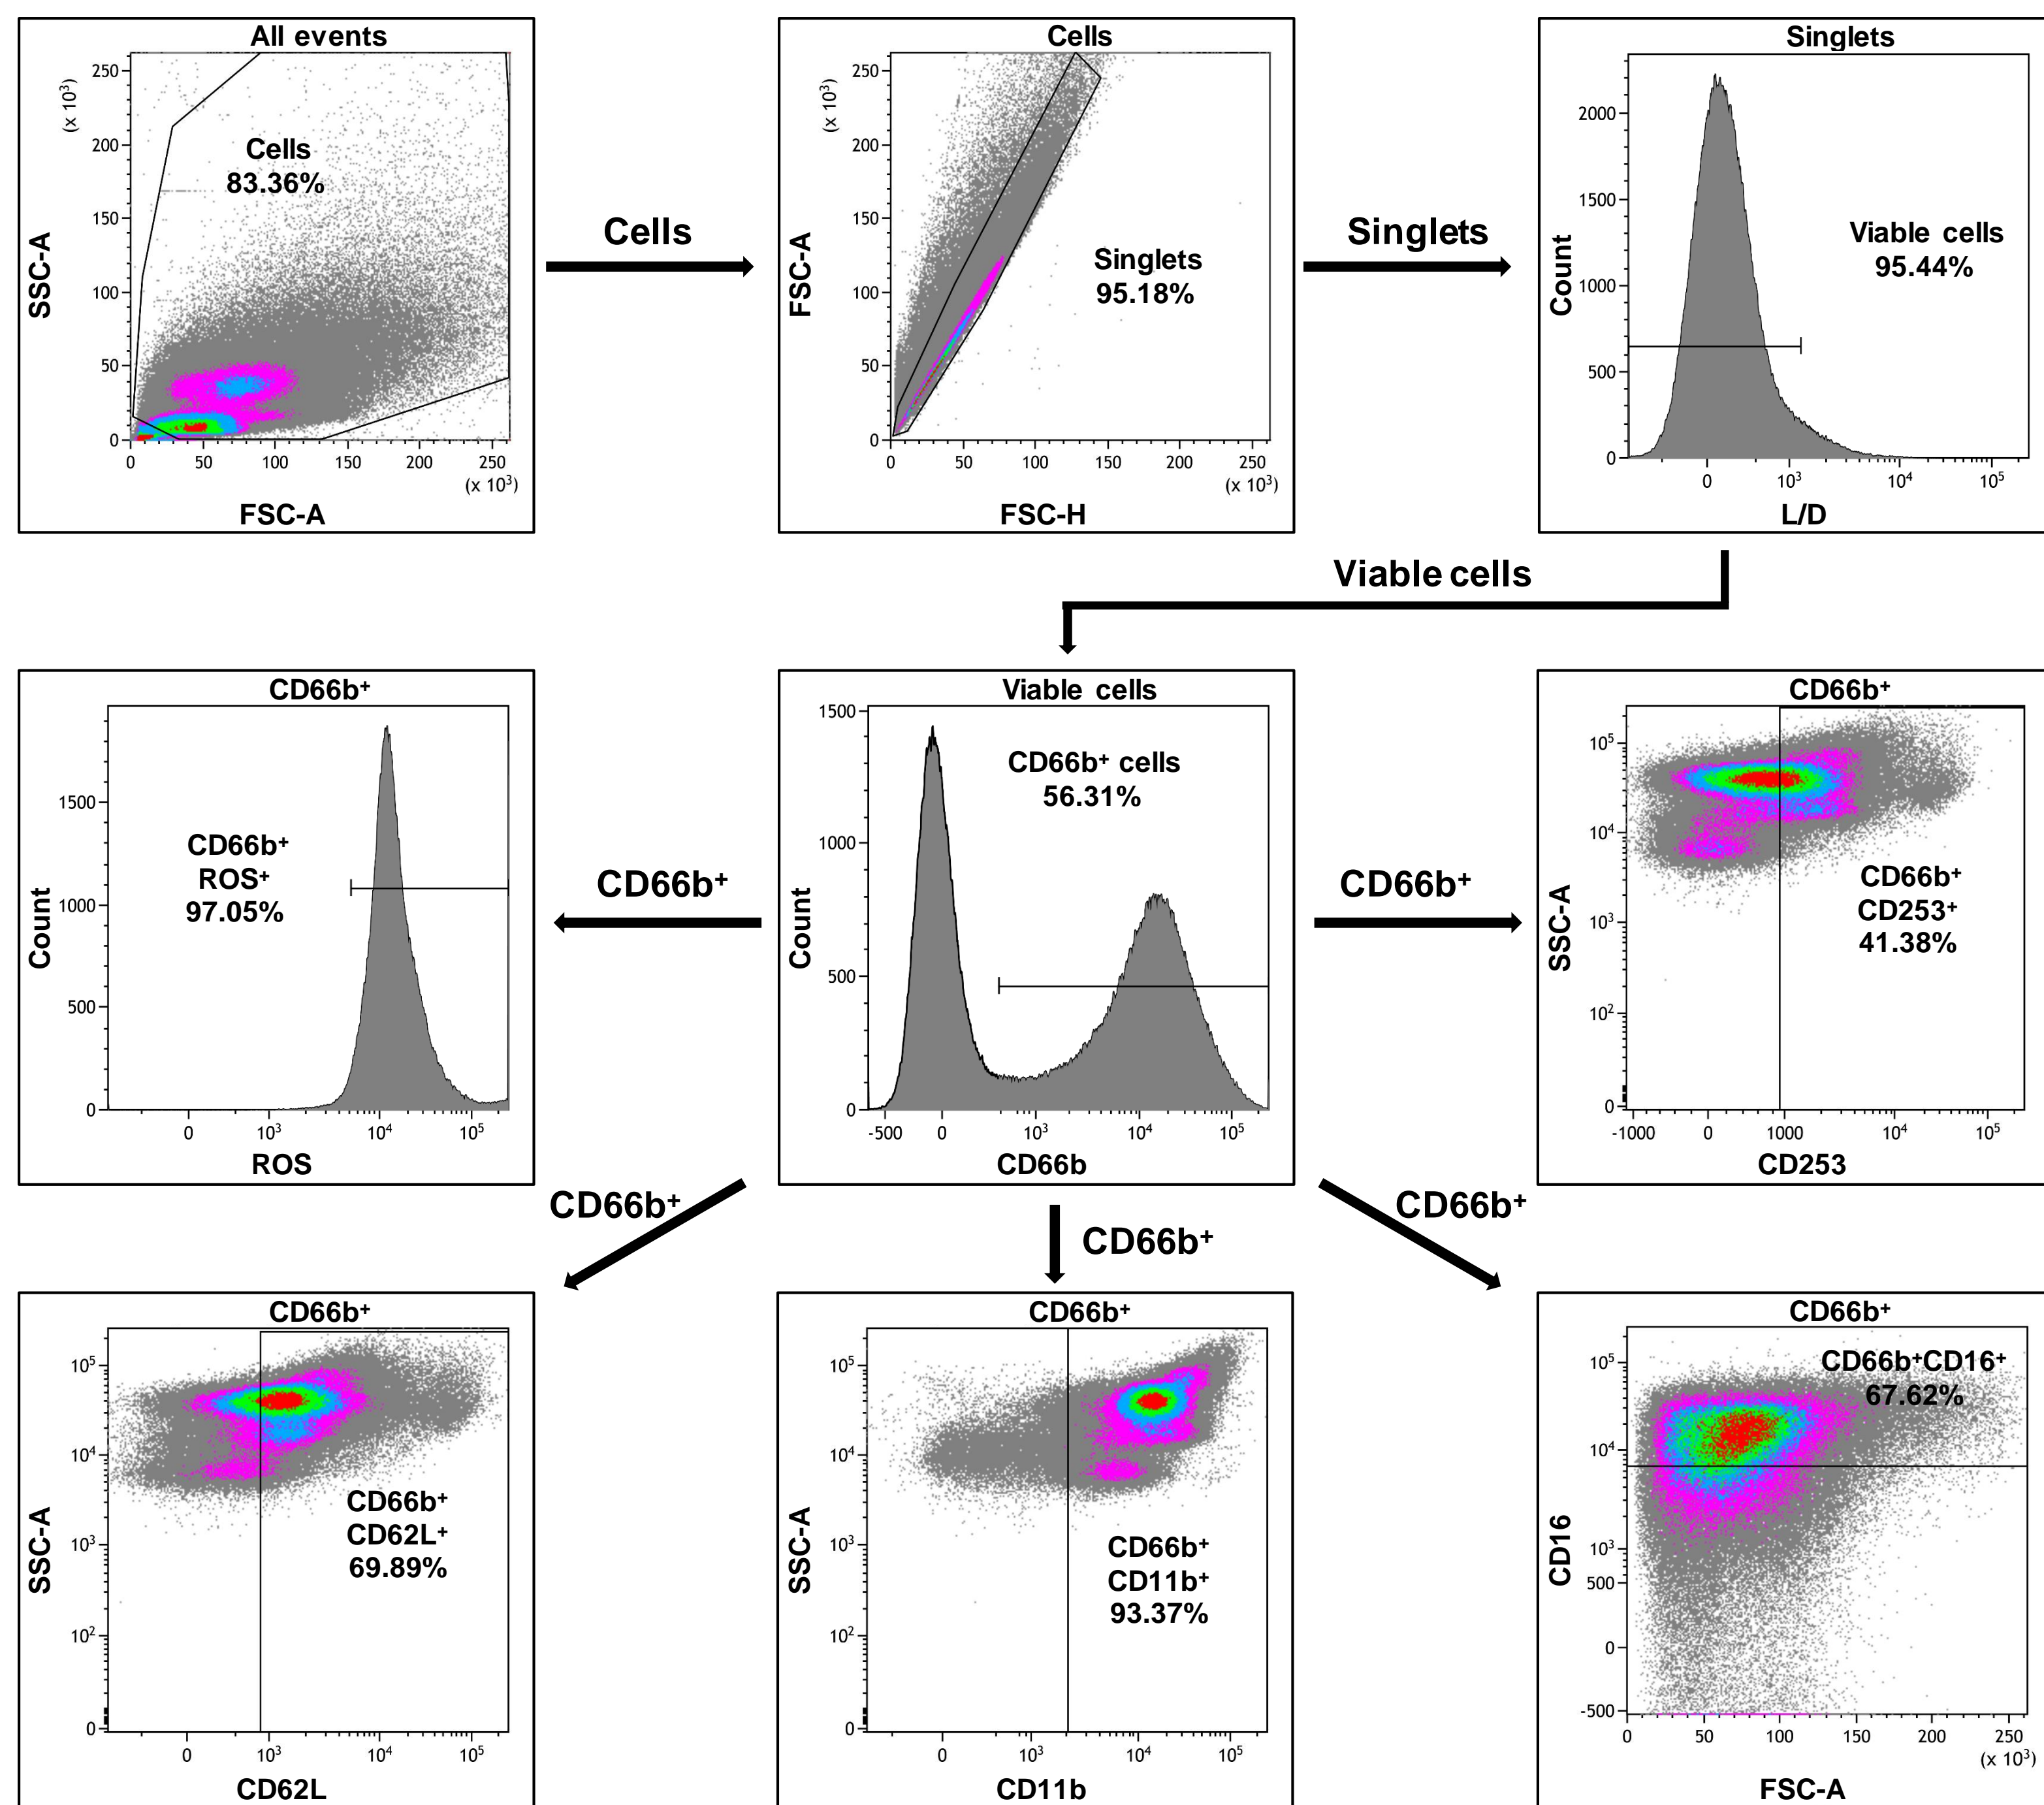

### Dendritic cells (Flow panel DC)

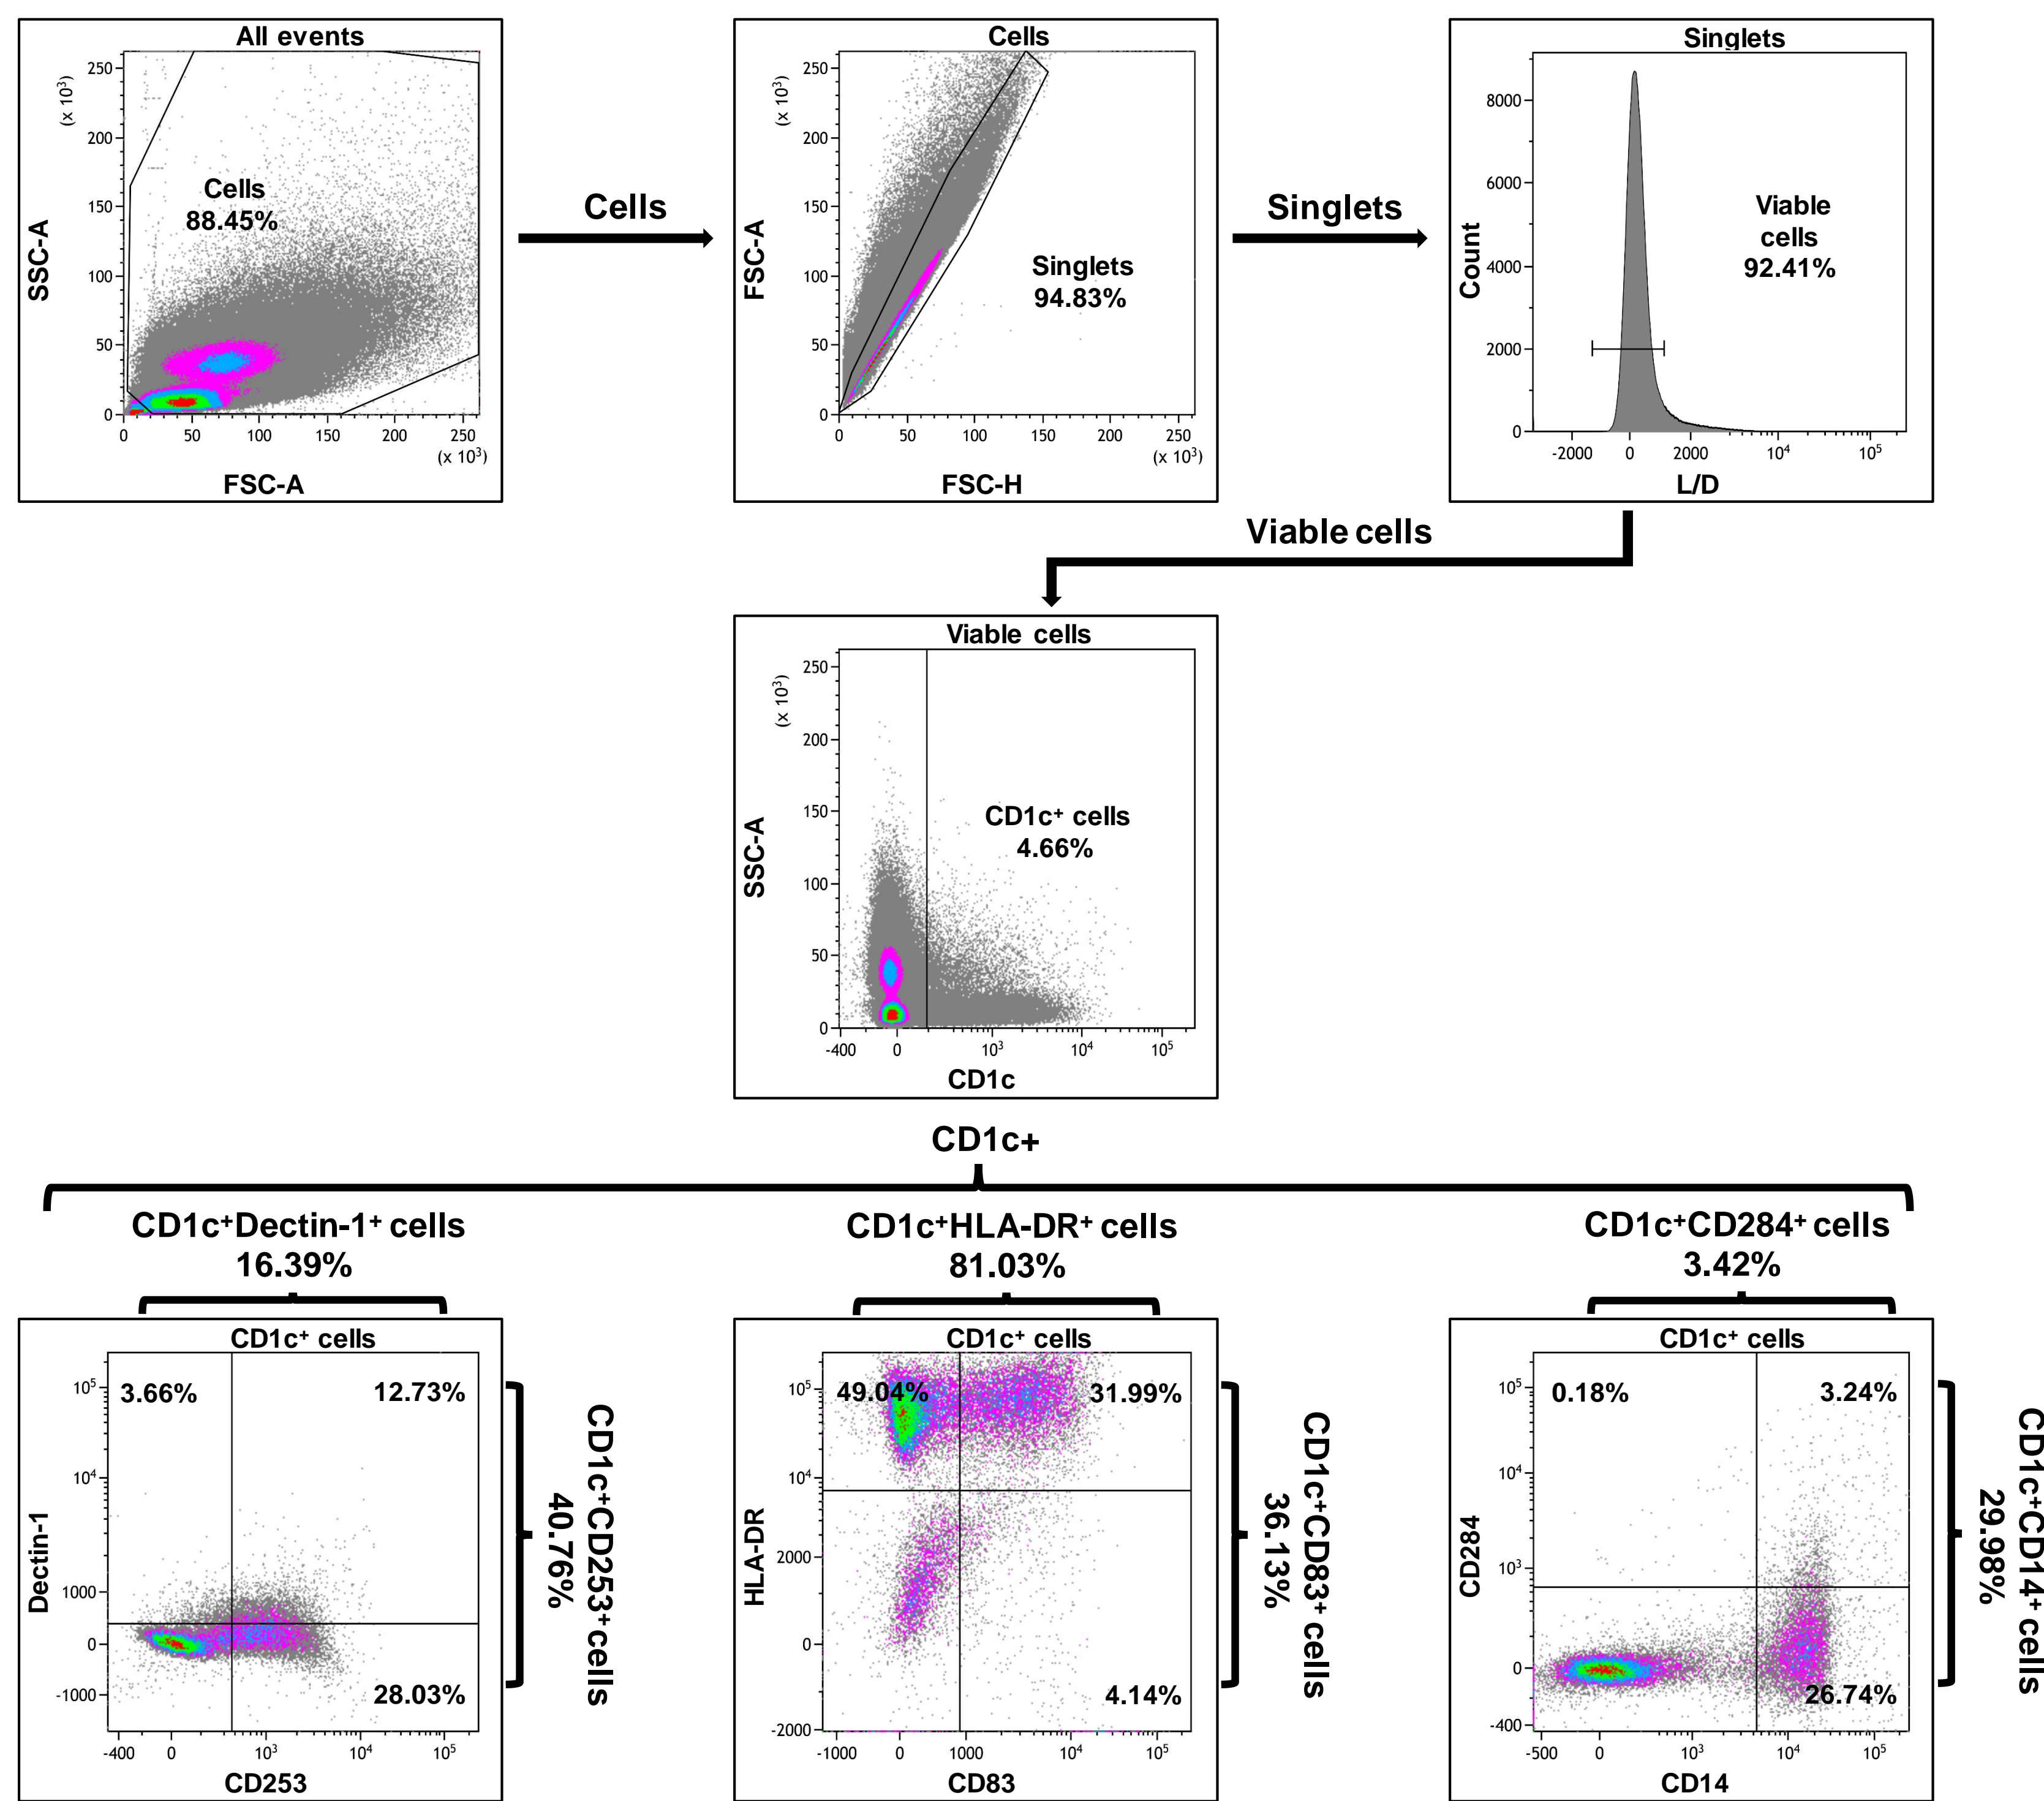

Supplement: DataSheet_1.pdf [file DataSheet_1.pdf]
