# Supplementary material for: COVID-19 patients share common, corticosteroid-independent features of impaired host immunity to pathogenic molds
Source: PubMed Central journal article supplement (PMC9427195; doi:10.3389/fimmu.2022.954985), 2022-08-16
Supplement: DataSheet_2.pdf [file DataSheet_2.pdf]

# COVID-19 patients share common, corticosteroid-independent features of impaired host immunity to pathogenic molds

## Supplementary Figures

Beeke Tappe<sup>1,#</sup> and Chris D. Lauruschkat<sup>1,#</sup>, Lea Strobel<sup>1</sup>, Jezreel Pantaleón García<sup>2</sup>, Oliver Kurzai<sup>3,4</sup>, Silke Rebhan<sup>1</sup>, Sabrina Kraus<sup>1</sup>, Elena Pfeuffer-Jovic<sup>5</sup>, Lydia Bussemer<sup>1</sup>, Lotte Possler<sup>6</sup>, Matthias Held<sup>5</sup>, Kerstin Hünninger<sup>3,4</sup>, Olaf Kniemeyer<sup>4</sup>, Sascha Schäuble<sup>4</sup>, Axel A. Brakhage<sup>4,7</sup>, Gianni Panagiotou<sup>4</sup>, P. Lewis White<sup>8</sup>, Hermann Einsele<sup>1</sup>, Jürgen Löffler<sup>1,\$,\*</sup> and Sebastian Wurster<sup>9,\*</sup>

<sup>1</sup>Department of Internal Medicine II, University Hospital of Würzburg, Würzburg, Germany

<sup>2</sup>Department of Pulmonary Medicine, The University of Texas MD Anderson Cancer Center, Houston, Texas, USA

<sup>3</sup>Institute for Hygiene and Microbiology, University of Würzburg, Würzburg, Germany

<sup>4</sup>Leibniz Institute for Natural Product Research and Infection Biology–Hans Knöll Institute, Jena, Germany

<sup>5</sup>Missionsärztliche Klinik Würzburg, Würzburg, Germany

<sup>6</sup>Main-Klinik Ochsenfurt, Würzburg, Germany

<sup>7</sup>Department of Microbiology and Molecular Biology, Institute of Microbiology, Friedrich Schiller University, Jena, Germany

<sup>8</sup>Public Health Wales, Microbiology Cardiff, Wales, UK

<sup>9</sup>Department of Infectious Diseases, Infection Control and Employee Health, The University of Texas MD Anderson Cancer Center, Houston, Texas, USA.

<sup>#</sup>These authors share first authorship

<sup>\$</sup>Requests for materials should be addressed to Jürgen Löffler (Loeffler\_J@ukw.de)

<sup>\*</sup>These authors have contributed equally to this work and are shared last and co-corresponding authors.

### **\* Correspondence:**

Prof. Dr. Jürgen Löffler, [Loeffler\\_J@ukw.de](mailto:Loeffler_J@ukw.de)

Asst. Prof. Dr. Sebastian Wurster, [stwurster@mdanderson.org](mailto:stwurster@mdanderson.org)

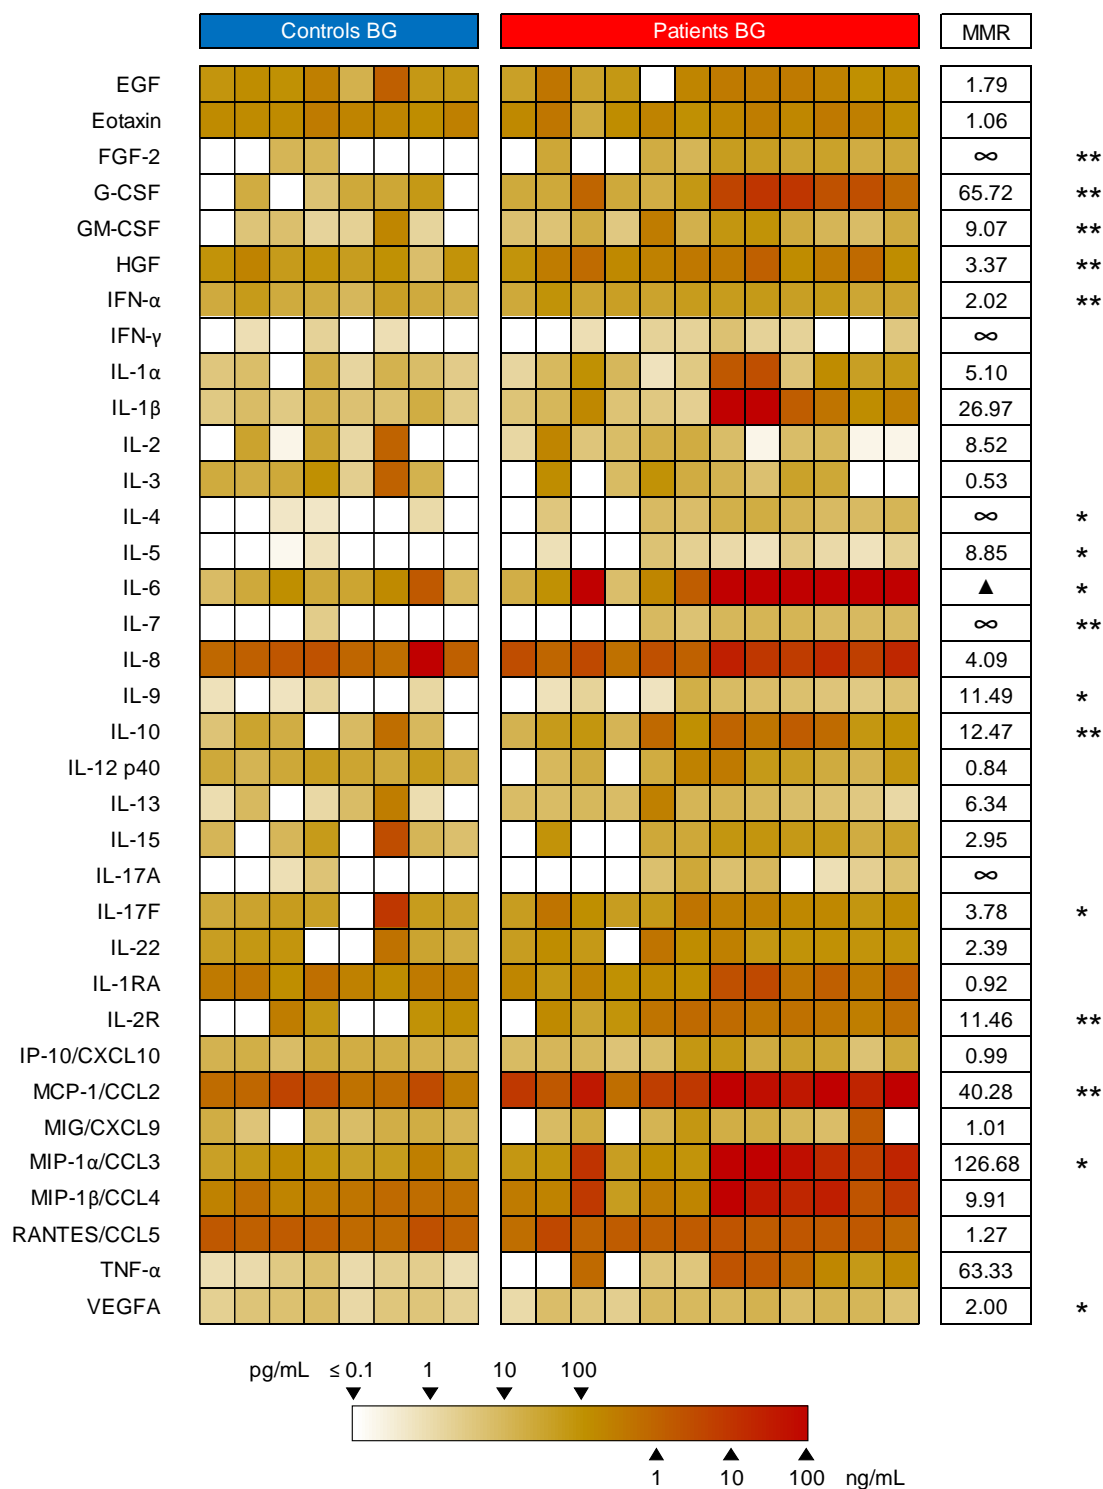

**Figure S1. Patients with COVID-19 exhibit strong hypercytokinemia in plasma supernatants of unstimulated whole blood.**

Heat map summarizing individual cytokine concentrations in unstimulated whole blood samples. MMR = median-to-median ratio (patients/controls). ∞ = infinite MMR (median 0 pg/mL in the control cohort). ▲ = high (>1000) yet undefined MMR (median of the patient cohort exceeding the quantifiable range). Mann-Whitney U test (patients versus controls) and Benjamini-Hochberg procedure to test for an FDR of < 0.2. \* p < 0.05, \*\* p < 0.01.

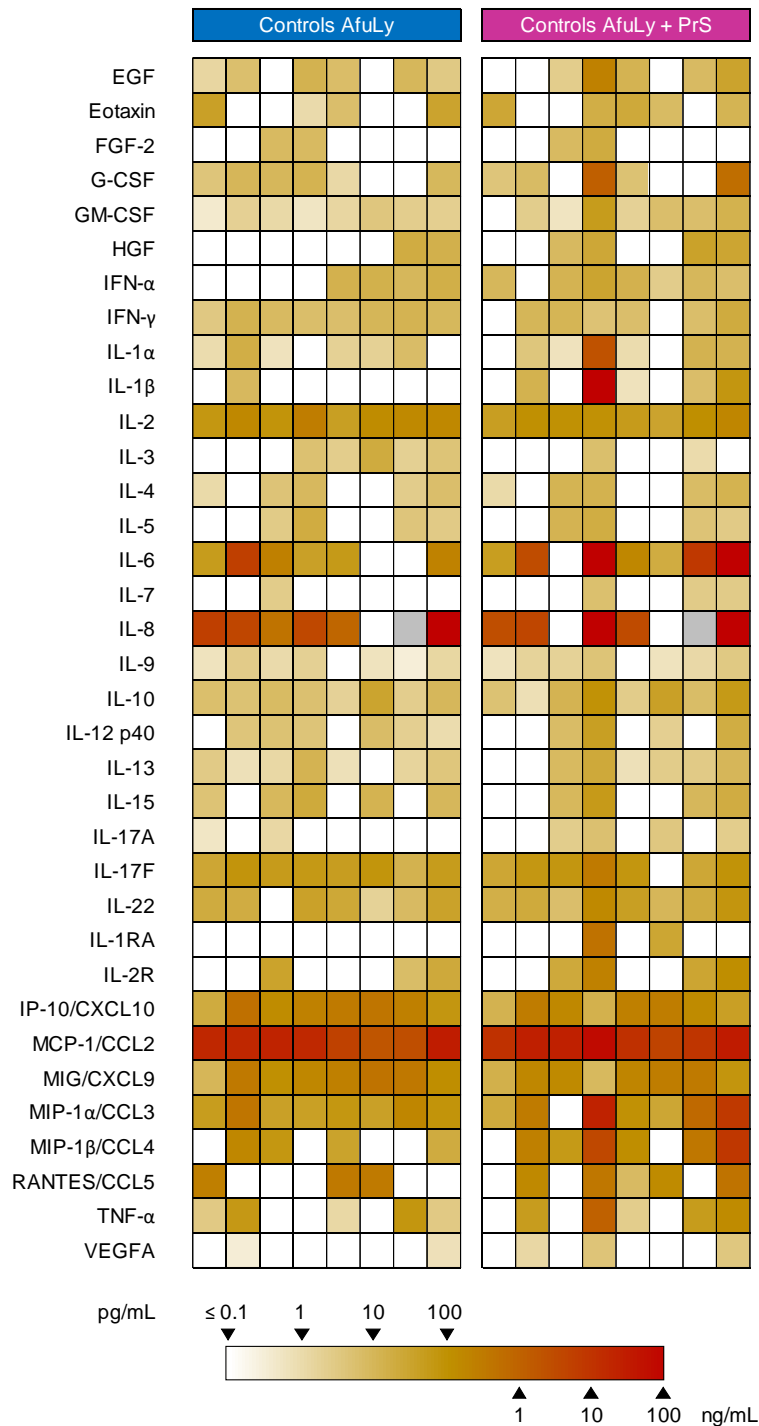

**Figure S2. Dual antigen exposure of whole blood from healthy donors cannot recapitulate impaired *Aspergillus*-induced cytokine response in COVID-19 patients.**

Heat map summarizing individual background-adjusted cytokine release in whole blood samples from healthy donor stimulated with *Aspergillus fumigatus* lysate (AfuLy) or a combination of AfuLy and SARS-CoV-2 Protein S (PrS). Grey boxes indicate non-determinable values (i.e., measurements with unstimulated background exceeding the detectable range). Paired Wilcoxon test and Benjamini-Hochberg procedure to test for a false-positive discovery rate (FDR) of  $< 0.2$ . No comparison reached FDR-adjusted significance. ■  $p < 0.05$  and  $FDR > 0.2$ . Colors of squares indicate the condition eliciting stronger cytokine release.

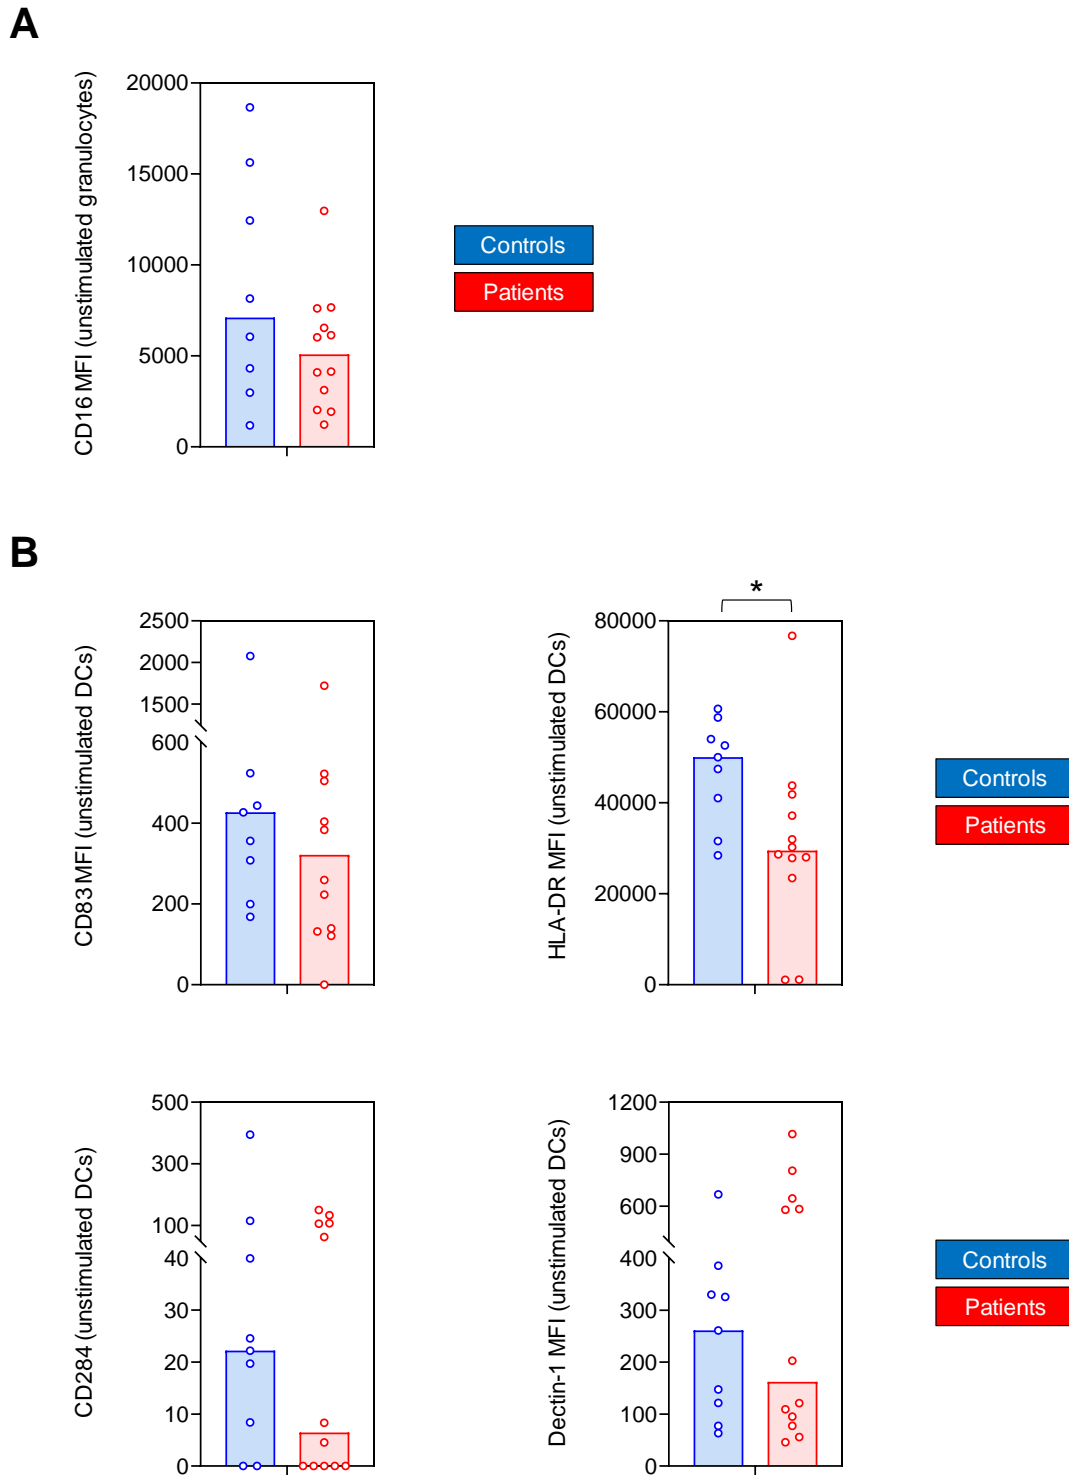

**Figure S3. Granulocytes and dendritic cells (DCs) from COVID-19 patients display a less mature phenotype.**

Individual and median (columns) expression (mean fluorescence intensity, MFI) of maturation markers and pattern recognition receptors on granulocytes (**A**) and DCs (**B**) in unstimulated whole blood. Mann-Whitney U test (patients versus controls) and Benjamini-Hochberg procedure to test for an FDR of < 0.2. \*  $p < 0.05$ .

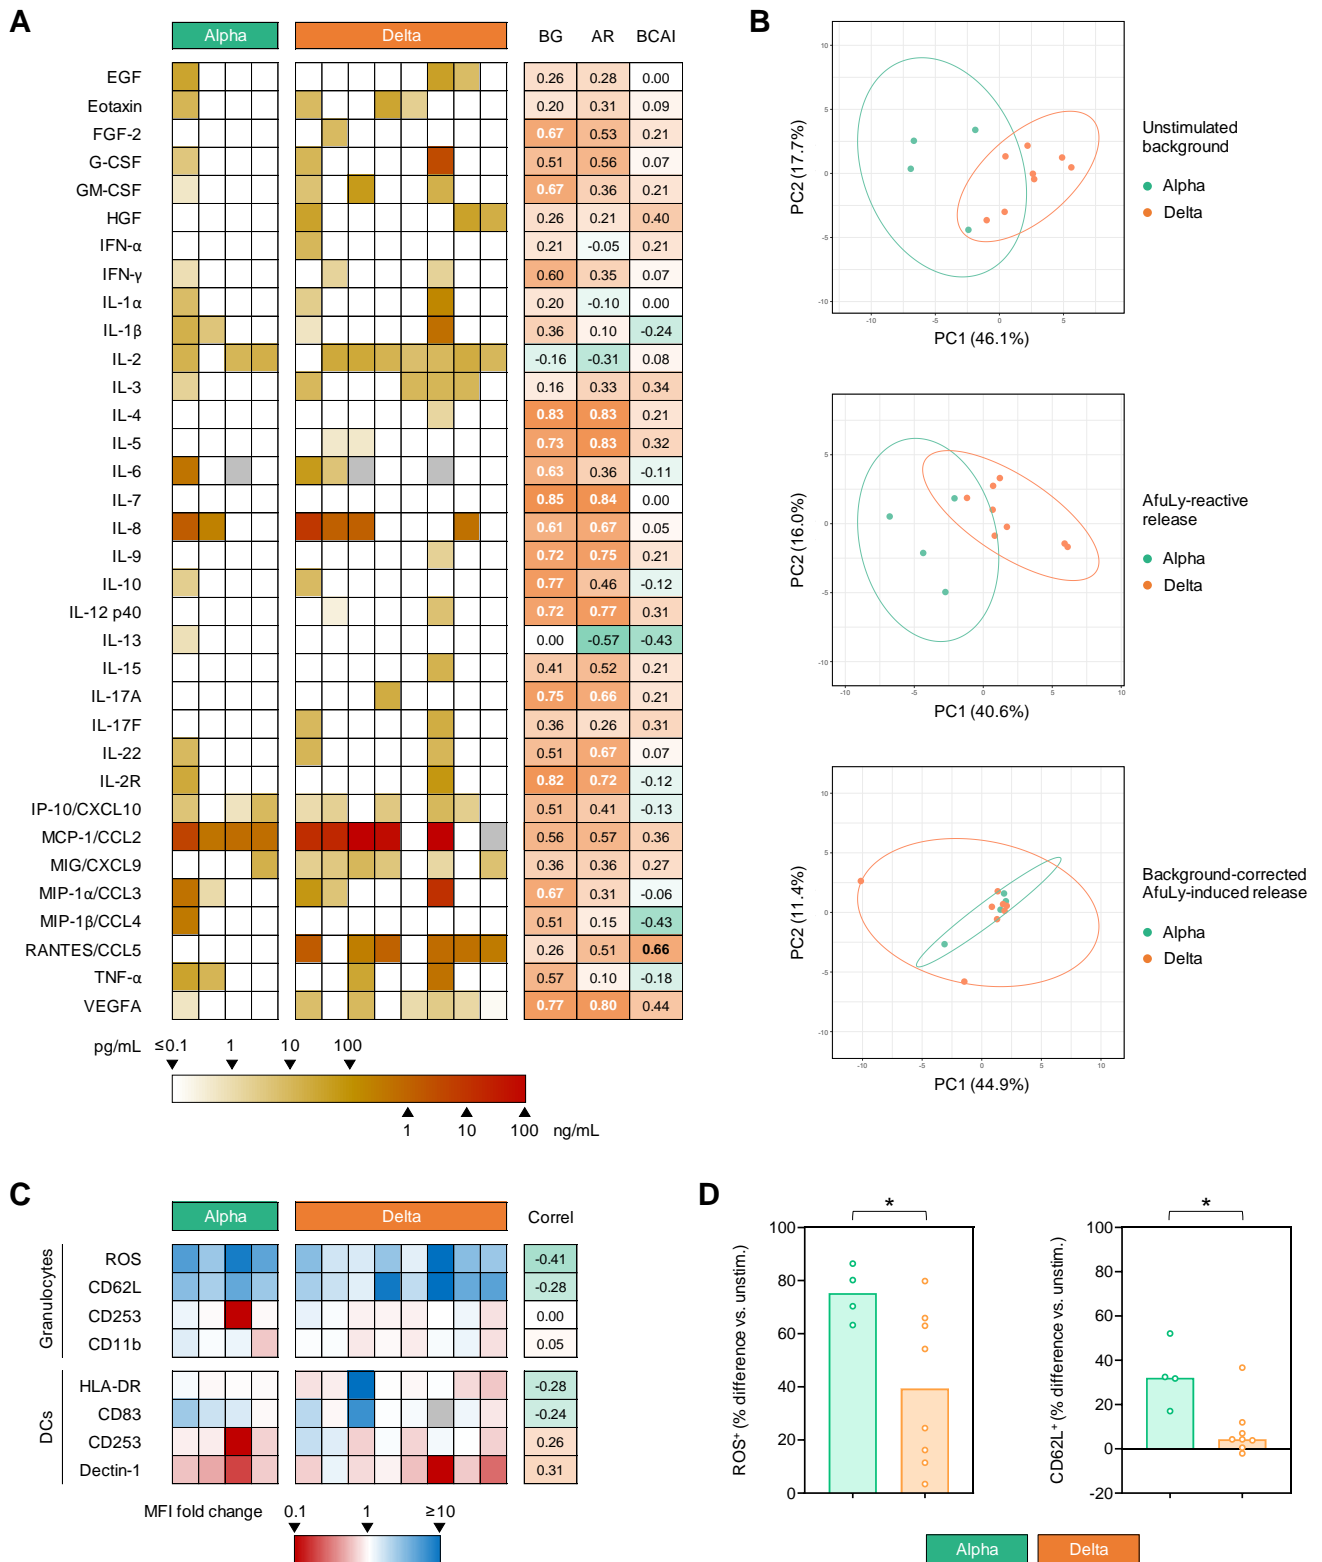

**Figure S4. Patients infected with the SARS-CoV-2 Delta variant have stronger baseline cytokinemia and weaker granulocyte responses to *Aspergillus fumigatus*.**

Caption on following page.

**Figure S4. Patients infected with the SARS-CoV-2 Delta variant have stronger baseline cytokinemia and weaker granulocyte responses to *Aspergillus fumigatus*.**

(A) Heat map summarizing background-adjusted *Aspergillus fumigatus* lysate (AfuLy)-induced cytokine release in COVID-19 patients during the Alpha and Delta wave. Additionally, rank-biserial correlation coefficients comparing unstimulated background (BG), AfuLy-reactive (AR), and background-corrected AfuLy-induced (BCAI) cytokine release with the wave (Alpha = 1, Delta = 2) are provided. Negative (green) and positive (orange) values indicate stronger cytokine responses in patients infected with the Alpha and Delta variant, respectively. Significant correlation is indicated by bold black fonts. Bold white fonts indicate correlation coefficients that remained significant after Benjamini-Hochberg correction for an FDR of 0.2. (B) Principal component analysis comparing unstimulated background, AfuLy-reactive, and background-adjusted AfuLy-induced cytokine release in patients during the Alpha and Delta wave. Ellipses represent 95% confidence ranges. (C) Heat map summarizing induction of activation markers in/on granulocytes and dendritic cells upon stimulation with *Aspergillus fumigatus* germlings (AfuG) in COVID-19 patients during the Alpha and Delta wave. Fold changes of mean fluorescence intensity (MFI) in stimulated versus unstimulated samples are represented by color scale. Grey boxes indicate non-determinable ratios (i.e., measurements with a baseline MFI  $\leq 0$ ). Rank-biserial correlation was performed as described above. (D) Background-adjusted AfuG-responsive frequencies of ROS- and CD62L-positive granulocytes in COVID-19 patients during the Alpha and Delta wave. Mann-Whitney U test. \*  $p < 0.05$ .

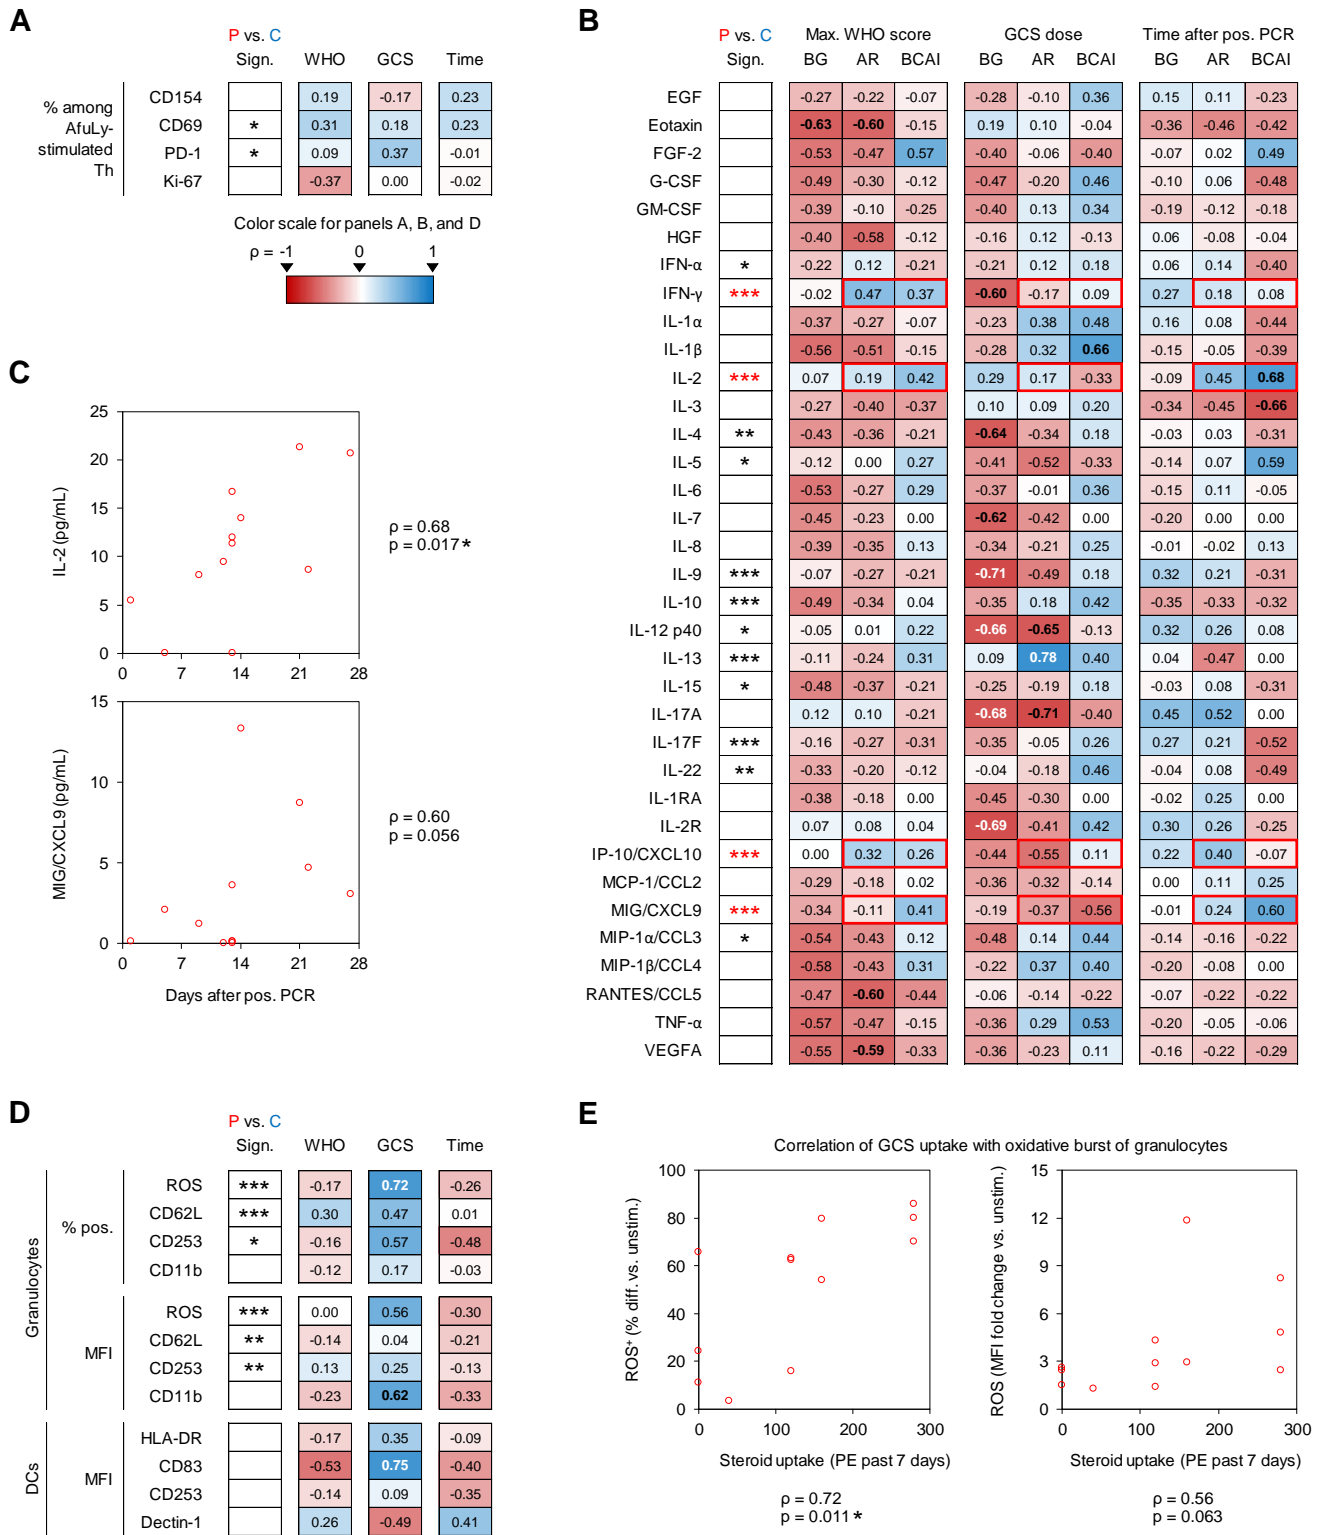

**Figure S5. Altered immune responses to *Aspergillus fumigatus* in hospitalized COVID-19 patients are largely decoupled from infection severity and glucocorticosteroid therapy.**

Caption on following page.

**Figure S5. Altered immune responses to *Aspergillus fumigatus* in hospitalized COVID-19 patients are largely decoupled from infection severity and glucocorticosteroid therapy.**

(A) Spearman rank correlation coefficients for comparisons of activation and exhaustion marker-positive frequencies of T-helper (Th) cells in *Aspergillus fumigatus* lysate (AfuLy)-stimulated whole blood with the patients' maximum WHO progression scores ("WHO"), glucocorticosteroid uptake within the past 7 days ("GCS", measured in mg total prednisolone equivalent), and time between first positive SARS-CoV-2 polymerase chain reaction (PCR) test and blood sampling for immunoassays ("Time"). CD154 and CD69 responses were background-adjusted. Asterisks in the first column indicate significantly weaker responses in COVID-19 patients ("P") versus controls ("C"), as shown in **Figure 2**. \*  $p < 0.05$ , \*\*  $p < 0.01$ , \*\*\*  $p < 0.001$ . (B) Spearman rank correlation coefficients for comparisons of clinical characteristics with unstimulated background (BG), AfuLy-reactive (AR), and background-corrected AfuLy-induced (BCAI) cytokine release. Significant correlation is indicated by bold black fonts. Bold white fonts indicate correlation coefficients that remained significant after Benjamini-Hochberg correction for an FDR of 0.2. Asterisks indicate significantly weaker AfuLy-induced cytokine release in COVID-19 patients versus controls, as shown in **Figure 3A**. Red asterisks denote significantly weaker AfuLy-reactive and background-corrected AfuLy-induced responses in COVID-19 patients, additionally highlighted by red boxes. (C) Correlation plots comparing time after positive PCR and background-corrected AfuLy-induced IL-2 and MIG/CXCL9 release. Spearman rank correlation coefficients ( $\rho$ ) and their p-values are provided. (D) Spearman rank correlation coefficients for comparisons of clinical characteristics with background-adjusted *Aspergillus fumigatus* germling (AfuG)-responsive frequencies of activation marker-positive granulocytes and fold changes of median fluorescence intensity (MFI) of activation markers on granulocytes and dendritic cells (DCs) in AfuG-stimulated versus unstimulated whole blood. Asterisks indicate significantly weaker responses in COVID-19 patients versus controls, as shown in **Figures 4A**. (E) Correlation plots comparing steroid intake within the past 7 days and background-adjusted ROS response to AfuG. Spearman rank correlation coefficients ( $\rho$ ) and their p-values are given.



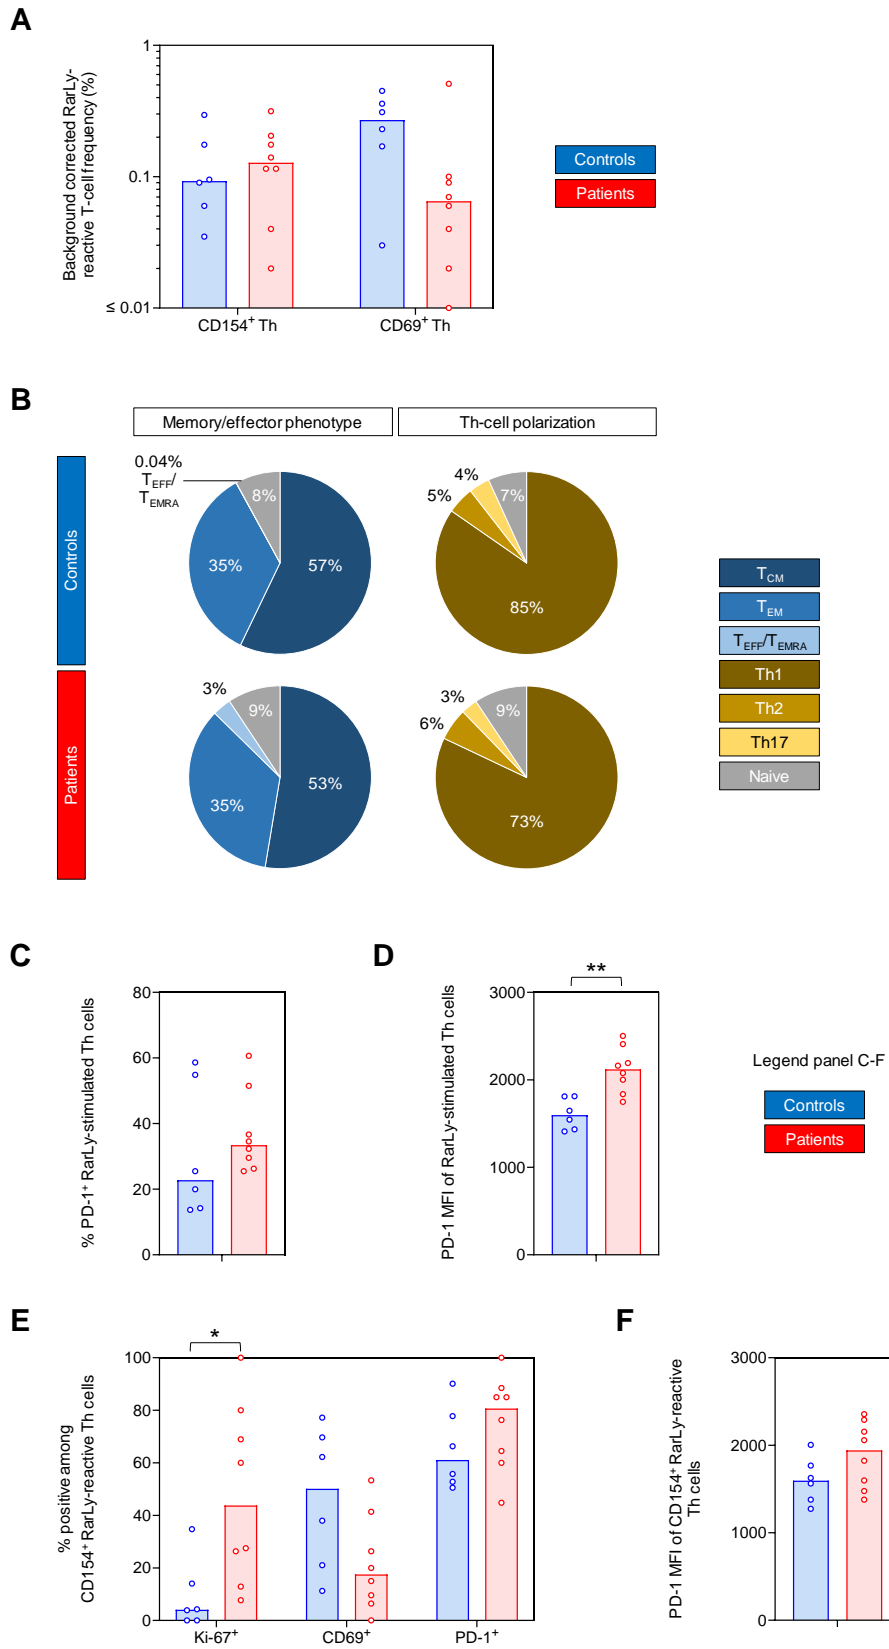

**Figure S6. COVID-19 patients show signs of impaired *Rhizopus arrhizus*-induced T-cell activation and increased T-helper cell exhaustion.**

Caption on following page.

**Figure S6. COVID-19 patients show signs of impaired *Rhizopus arrhizus*-induced T-cell activation and increased T-helper cell exhaustion.**

(A) Background-corrected frequencies of *Rhizopus arrhizus* lysate (RarLy)-reactive CD4<sup>+</sup> T-helper (Th) cells detectable by CD154 or CD69 upregulation. (B) Mean distributions of memory/effector phenotypes and polarization of RarLy-reactive Th cells. (C) Frequencies of PD-1<sup>+</sup> cells among Th cells in RarLy-stimulated samples. (D) Mean fluorescence intensity (MFI) of PD-1 on Th cells in RarLy-stimulated samples. (E) Frequencies of CD69<sup>+</sup>, Ki-67<sup>+</sup>, and PD-1<sup>+</sup> cells among CD4<sup>+</sup> CD154<sup>+</sup> RarLy-reactive Th cells. (F) PD-1 MFI of CD4<sup>+</sup> CD154<sup>+</sup> RarLy-reactive Th cells. (A, C-F) Columns represent medians. (A-F) Mann-Whitney U test (patients versus controls) and Benjamini-Hochberg procedure to test for a false-positive discovery rate (FDR) of < 0.2. \*\* p < 0.01. Abbreviations: T<sub>CM</sub> = central memory T cells, T<sub>EM</sub> = effector memory T cells, T<sub>EFF</sub>/T<sub>EMRA</sub> = effector T cells/terminally differentiated effector memory T cells re-expressing CD45RA.
